# 1 2 Dimensionality Reduction on Spatio-Temporal Maximum Entropy Models of 3 Spiking Networks

4  
5 Rubén Herzog<sup>1,5\*</sup>, María-José Escobar<sup>2</sup>, Rodrigo Cofre<sup>3</sup>, Adrián G. Palacios<sup>1,5</sup>, Bruno Cessac<sup>4</sup>,

6 **1** Centro Interdisciplinario de Neurociencia de Valparaíso, Universidad de Valparaíso, Valparaíso,  
7 Chile.

8 **2** Departamento de Electronica, Universidad Tecnica Federico Santa Maria, Valparaíso, Chile.

9 **3** CIMFAV, Facultad de Ingeniería, Universidad de Valparaíso, Valparaíso, Chile.

10 **4** INRIA Biovision team Sophia Antipolis and Universite Cote d’Azur, Sophia-Antipolis, France.

11 **5** Instituto de Sistemas Complejos de Valparaiso, Chile.

12 Current Address: Centro Interdisciplinario de Neurociencia, Universidad de Valparaiso, Pasaje  
13 Harrington 287, Playa Ancha, ZIP 2360102, Valparaiso, Chile.

14 \* rubenherzog@ug.uchile.cl

## 15 **Abstract**

16 Maximum entropy models (MEM) have been widely used in the last 10 years to characterize the  
17 statistics of networks of spiking neurons. A major drawback of this approach is that the number  
18 of parameters used in the statistical model increases very fast with the network size, hindering its  
19 interpretation and fast computation. Here, we present a novel framework of dimensionality reduction  
20 for generalized MEM handling spatio-temporal correlations. This formalism is based on information  
21 geometry where a MEM is a point on a large-dimensional manifold. We exploit the geometrical  
22 properties of this manifold in order to find a projection on a lower dimensional space that best  
23 captures the high-order statistics. This allows us to define a quantitative criterion that we call the  
24 "degree of compressibility" of the neuronal code. A powerful aspect of this method is that *it does not*  
25 *require fitting the model*. Indeed, the matrix defining the metric of the manifold is computed directly  
26 via the data without parameters fitting. The method is first validated using synthetic data generated  
27 by a known statistics. We then analyze a MEM having more parameters than the underlying data  
28 statistics and show that our method detects the extra dimensions. We then test it on experimental  
29 retinal data. We record retinal ganglion cells (RGC) spiking data using multi-electrode arrays (MEA)  
30 under different visual stimuli: spontaneous activity, white noise stimulus, and natural scene. Using  
31 our method, we report a dimensionality reduction up to 50% for retinal data. As we show, this is quite  
32 a huge reduction compared to a randomly generated spike train, suggesting that the neuronal code, in  
33 these experiments, is highly compressible. This additionally shows that the dimensionality reduction  
34 depends on the stimuli statistics, supporting the idea that sensory networks adapt to stimuli statistics  
35 by modifying the level of redundancy.

## 36 **Author Summary**

37 Maximum entropy models (MEM) have been widely used to characterize the statistics of networks of  
38 spiking neurons. However, as the network size increases, the number of model parameters increases  
39 rapidly, hindering its interpretation and fast computation. Here, we propose a method to evaluate the  
40 dimensionality reduction of MEM, based on the geometrical properties of the manifold best capturing  
41 the network high-order statistics. Our method is validated with synthetic data using independent  
42 or correlated neural responses. Importantly, we show that dimensionality reduction depends on the  
43 stimuli statistics, supporting the idea that sensory networks adapt to stimuli statistics modifying the  
44 level of redundancy.

## 45 Introduction

46 It is widely admitted that the spikes exchanged between neurons convey information encoded in a, yet  
47 unknown, manner. Deciphering these hidden "neural codes" - there is no reason why neurons should  
48 use a unique coding strategy - is a contemporary challenge. A natural approach consists of detecting  
49 statistical regularities in the spike patterns ("words") produced by a population of neurons. This  
50 problem is challenging since the number of possible patterns grows exponentially with the number  
51 of neurons and the time window defining the words. A population of  $N$  neurons may produce  $2^{N \times \tau}$   
52 words of time length  $\tau$ , but experimental recordings fortunately produce a quite smaller subset. In  
53 practice, once the number of neurons increases beyond 20, the total number of possible words becomes  
54 intractable. Yet, one has to extract, from the empirical statistics of the words displayed, a canonical  
55 model predicting the observed statistics, paving a possible way toward decoding. A theoretical frame-  
56 work to tackle this issue is based on the Maximum Entropy Principle (MEP) [42, 46]. The objective  
57 is to find the least structured model - the one with maximum entropy - given constraints provided by  
58 the average values of certain "features" or observables.

59 In its simplest form MEP restricts to spikes occurring at the same time. For example, the Ising  
60 model is constrained by the occurrence of spikes emitted at the same time by 2 distinct neurons  
61 (Model with "pairwise interactions") [2, 3]. Most extensions with more neurons (triplets-quadruplets)  
62 restrict as well to spikes occurring at the same time [8, 9, 10]. The mathematical consequence is that,  
63 in these MEM, spikes events occurring at different times are independent. The probability of spike  
64 patterns occurrence at time  $t$  does not depend on the history. We call these models "MEMs without  
65 memory". However, neurons interact together with some delay, inducing spatio-temporal correlations  
66 which should be considered as well as constraints for the MEM [8, 9, 10]. The MEP can be extended  
67 to handle these spatio-temporal correlations [12, 16] capturing and predicting the collective spatio-  
68 temporal pattern activity. This approach has been successfully used to characterize the spike train  
69 statistics in cortex cultures [11] and in the vertebrate retina network [33, 14].

70 A strong caveat of MEM is their number of parameters increasing rapidly with the size of the  
71 system. But one expects some redundancy in the spike activity of biological neuronal networks (in  
72 contrast e.g. with artificial neural networks with random uncorrelated synapses), reflecting a latent  
73 structure on the statistics of the activity. From this point of view, the dimensionality of the MEM  
74 (the number of its parameters) could be reduced. There might be some analogy with signal processing  
75 compression, where the presence of statistical redundancy can be exploited to map the signal onto  
76 a subset of independent channels (i.e. non-redundant). As shown in [23, 13], the reduction is more  
77 pronounced if the parameters are related by hidden mathematical dependencies.

78 Several tools are available to reduce the dimensionality of a given statistical model, based on the  
79 trade-off between dimensionality and likelihood, e.g Akaike Information Criterion (AIC), Bayesian  
80 Information Criterion (BIC) or Minimum Description length (MDL) among others. However, these  
81 methods necessarily need to fit different models to the same dataset to find the optimal dimension.  
82 This can be prohibitive in the case of MEM when considering a large number of neurons. In contrast,  
83 a formal framework to find the optimal dimensionality of MEM based on the geometrical properties of  
84 the manifold of probability distributions -where a MEM is a point in large dimensional space, whose  
85 coordinates are the parameters- was developed in [41]. It generalizes over standard methods (AIC and  
86 BIC), taking into account simultaneously the dimensionality, the likelihood and the geometry of the  
87 manifold formed by the family of statistical models. Here, we propose to exploit the geometric structure  
88 of the manifold formed by the MEM's to find an optimal set of dimensions capturing the information  
89 contained on neural spiking data. Our approach generalizes previous approaches considering only i.i.d  
90 samples [41], and is general enough to consider spatio-temporal interactions at several lags between  
91 neurons. It relies on the spectral properties of a matrix, called "Fisher metric" in statistics and  
92 information geometry [24] and "susceptibility Matrix" in statistical physics, capturing the effect of  
93 MEM parameters variations on the second-order statistics of the network activity. Remarkably, as we  
94 show here this matrix can be numerically computed from data without fitting the MEM parameters,  
95 allowing us to apply the method to a large set of neurons ( $\sim 100$  neurons). Based on the spectral  
96 properties of this matrix, which reflects the local geometry of manifold, we determine the optimal  
97 model dimensionality that still preserves the correlation structure in neural activity.

98 The method is first validated using synthetic data generated with a known underlying statistics.  
99 It is then applied to the spiking response in a neural population of retinal ganglion cells (RGC) *in*  
100 *vitro*, recorded from a diurnal rodent *Octodon degus* [26] using a 252-MEA (multi-electrode array).  
101 We consider three sets of neural responses obtained after applying three type of visual stimuli: i)  
102 spontaneous photopic activity; ii) white-noise checkerboard and iii) a short natural movie. From the  
103 mathematical analysis and from an analogy with signal compression, we define a "compressibility"  
104 criterion for the MEM. Based on our experimental observations, we found that RGC activity is highly  
105 compressible ( $\sim 50\%$  of the imposed model dimensionality) and that the stimuli spatio-temporal  
106 modulation increases the number of independent dimensions required to optimally represent the neural  
107 activity. This suggests that RGC population activity adapts to stimuli conditions, changing the  
108 number of "coding channels" according to stimuli correlations.

## 109 Methods

### 110 Spike trains

111 We consider the spiking activity data from a population of  $N$  interacting neurons. This data usually  
112 comes from experimental recordings using multi-electrode-arrays in the retina or cortical areas. We  
113 assume that there is a minimal time interval such that any neuron fires at most one spike within this  
114 interval. This provides a time discretization usually referred as "binning". The *spike-state*  $\omega_i(n)$ ,  
115 takes the value 1 whenever the  $i$ -th neuron emits a spike at the time bin  $n$ , otherwise is zero. The  
116 *spiking pattern*  $\omega(n) := [\omega_k(n)]_{k=1}^N$  is the spike-state of the entire network at time  $n$ . The *spike block*  
117  $\omega_{t_1}^{t_2} = \{\omega(n)_{t_1 \leq n \leq t_2}\}$  represents the activity of the whole network between time bins  $t_1$  and  $t_2$ . The  
118 *length* of a spike block is the number of time steps  $t_2 - t_1 + 1$ . Experimental data consist of a *spike-block*  
119 of finite size  $T$ , denoted by  $\omega_1^T$ . In this paper we also consider infinite spike sequences  $\omega_0^{+\infty}$ , denoted  
120 by  $\omega$  to alleviate notations. The state space of an infinite sequence of spiking patterns is denoted by  
121  $\Omega$ .

### 122 Observables and Monomials

We call *observable* a function  $f : \Omega \rightarrow \mathbb{R}$ , that associates a real number to a spike-train. We say that  
 $f$  has range  $R$ , if for every pair of spike trains  $\omega, \omega' \in \Omega$  we have that  $f(\omega) = f(\omega')$  if and only if  
 $\omega_0^{R-1} = \omega_0'^{R-1}$ , that is,  $f$  only depends on the first  $R$  spike patterns of the spike-train. An important  
class of observables are the *monomials*, which are binary observables consisting of finite products of  
spike states, given by:

$$m_l(\omega) = \prod_{k=1}^q \omega_{i_k}(t_k).$$

123 If one fixes a finite set of pairs  $\{(i_k, t_k)\}_{k=1}^q = l$  (neuron index, time index), there are finitely many  
124 such possible monomials, which can be indexed by an index  $l$  in one-to-one correspondence with the  
125 set of pairs  $(i_k, t_k)$ . The observable  $m_l(\omega) = 1$ , if and only if neuron  $i_k$  spikes at time  $t_k, \forall k \in \{1, \dots, q\}$   
126 in the spike-train  $\omega$ , where  $q$  is the number of spike states in the observable, and  $m_l(\omega) = 0$  otherwise.  
127 In a range  $R \geq 1$  monomial, the firing times  $t_k$  are constrained within the interval  $\{0, \dots, R - 1\}$ .

### 128 Inference of the spike train statistics via Maximum Entropy principle

129 A generalized version of the maximum entropy approach can be framed rigorously using the ther-  
130 modynamic formalism of subshifts of finite type [38], which offers a way to build maximum entropy  
131 Markov chains (MEMC) from data in a principled way through a variational principle [16, 13]. As  
132 we will see, framing the maximum entropy problem in this way is particularly useful, as set up the  
133 conceptual framework to exploit ideas from thermodynamics and information geometry.

134 We assume that the spiking data is a sample of a time homogeneous Markov chain of memory  $R$ ,  
135 i.e., taking values in  $\mathcal{A}_N^R$ , in other words,  $\mathbb{P}(\omega_1^T)$  can be decomposed according to:

$$\mathbb{P}(\omega_1^T) = \mathbb{P}(\omega_{T-R+1}^T, \dots, \omega_3^{R+2}, \omega_2^{R+1}, \omega_1^R) = P(\omega_{T-R+1}^T | \omega_{T-R}^{T-1}) \dots P(\omega_3^{R+2} | \omega_2^{R+1}) P(\omega_2^{R+1} | \omega_1^R) p(\omega_1^R)$$

136 where  $p(\omega_1^R)$  is the probability of the initial state and  $P(\omega_i^{i+R-1} | \omega_{i-1}^{i+R-2})$  is the conditional probability  
 137 or the transition matrix elements. The goal of the inference problem is to estimate the transition  
 138 matrix  $P$ .

## 139 Entropy Rate

140 If the spike train  $\omega$  is characterized by a stationary ergodic Markov measure denoted by  $\mu(p, P)$  taking  
 141 values in  $\mathcal{A}_N^R$  with homogeneous transition matrix  $P$  and unique stationary distribution  $p$ , the entropy  
 142 rate of  $\omega$  is referred as *Kolmogorov-Sinai entropy (KSE)* of  $\mu(p, P)$  and takes the simple form [39]:

$$\mathcal{S}_{KS}(p, P) = - \sum_{i,j \in \mathcal{A}_N^R} p_i \sum_j P_{ij} \log P_{ij}. \quad (1)$$

143 where  $P_{ij} = P(j|i)$ . It is easy to see that when the stochastic process is i.i.d ( $P_{ij} = p_j$ ) we recover the  
 144 classical definition of Shannon entropy.

## 145 Variational Principle

146 We now introduce the maximum entropy principle (MEP) in the context of Markov chains (it extends  
 147 to chain with infinite memory). In comparison to the standard statistical physics formulation of  
 148 MEP, the present formalism extends to time-dependent interactions including with an infinite range  
 149 (requiring then appropriate summability conditions [37]).

150 Given a set of observables (monomials)  $m_l, l = 1 \dots L$ , we denote  $\nu[m_l]$  the expectation of  $m_l$  under  
 151 the probability  $\nu$ . We also denote  $c_l$  the empirical average of  $m_l$  (i.e. measured from an experimental  
 152 raster). The MEP find the unique invariant probability  $\mu$  satisfying  $\mu[m_l] = c_l, l = 1 \dots L$  that  
 153 maximize the KSE. This is equivalent to solve the following problem considering observables of range  
 154  $R \geq 2$ :

$$\sup_{\nu \in \mathcal{M}_{inv}} \left\{ \mathcal{S}_{KS}[\nu] : \nu[m_l] = c_l, \quad \forall l \in \{1, \dots, L\} \right\}. \quad (2)$$

155 where  $\mathcal{M}_{inv}$  is the set of translational invariant measures (stationary). Since the function  $\nu \rightarrow \mathcal{S}_{KS}[\nu]$   
 156 is strictly concave, there is a unique maximizing Markov measure  $\mu(p, P)$  given the constraints  $c_l$ . This  
 157 probability is uniquely defined by the *potential*:

$$\mathcal{H} = \sum_{l=1}^L h_l m_l, \quad (3)$$

158 This is a linear combination of the monomials  $m_l$  associated with constraints. The coefficients  $h_l$   
 159 are called the parameters of the model as there variation change the probability of events. They also  
 160 formally correspond to interactions between neurons (e.g.; in the Ising model  $h_l$  are either the pairwise  
 161 interaction  $J_{ij}$  between two neurons - monomials of type  $\omega_i(0)\omega_j(0)$  - or the local external magnetic  
 162 field - monomials of type  $\omega_i(0)$ ).

163 Equation (2) is equivalent to the following unconstrained problem, which is a particular case of  
 164 the so-called *variational principle* of the thermodynamic formalism [38]:

$$\mathcal{P}[\mathcal{H}] = \sup_{\nu \in \mathcal{M}_{inv}} \left\{ \mathcal{S}_{KS}[\nu] + \nu[\mathcal{H}] \right\} = \mathcal{S}_{KS}[\mu] + \mu[\mathcal{H}_\beta], \quad (4)$$

165  
 166 where  $\mathcal{P}[\mathcal{H}]$  is called the *free energy of  $\mathcal{H}$* , and  $\nu[\mathcal{H}] = \sum_{l=1}^L h_l \nu[m_l]$  is the average value of  $\mathcal{H}$  with  
 167 respect to  $\nu$ .

168

169 The average value of the observables, their correlations, as well as their higher cumulants can be  
 170 obtained by taking the successive derivatives of the free energy with respect to the parameters  $h$ . This  
 171 outlines the important role played by the free energy in this framework. In particular, taking the first  
 172 derivative:

$$\frac{\partial \mathcal{P}[\mathcal{H}]}{\partial h_l} = \mu[m_l], \quad \forall l \in \{1, \dots, L\} \quad (5)$$

173 where  $\mu[m_l]$  is the average of  $m_l$  with respect to  $\mu$ . The second derivative of the free energy w.r.t a  
 174 single parameter  $h_l$  gives the second cumulant or the variance of the observable  $m_l$ :

$$\frac{\partial^2 \mathcal{P}[\mathcal{H}]}{\partial h_l^2} = \mu[m_l^2] - \mu^2[m_l] \quad \forall l \in \{1, \dots, L\}. \quad (6)$$

## 176 Susceptibility matrix

177 Let  $\phi$  be the shift map  $\phi : \omega \rightarrow \omega$ , defined by  $\phi^i(\omega) = \omega_{i+1}^\infty$ . Let  $m_l$  be an arbitrary observable. We  
 178 may consider the sequence  $\{m_l \circ \phi^i(\omega)\}$  as a random variable whose statistical properties depend on  
 179 those of the process producing the samples of  $\omega$ . For a pair  $m_l, m_{l'}$  of monomials, the *time covariance*  
 180 *of order  $r$*  of the stationary processes  $\{m_l \circ \phi^n; n \geq 0\}$  and  $\{m_{l'} \circ \phi^n; n \geq 0\}$  is defined as:

$$C_{l,l'}(r) := \int m_l \cdot m_{l'} \circ \phi^r d\mu - \int m_l d\mu \int m_{l'} d\mu \quad (7)$$

181 In particular, the auto-covariance of order  $r$  is:

$$C_l(r) := \int m_l \cdot m_l \circ \phi^r d\mu - \left( \int m_l d\mu \right)^2 \quad (8)$$

182 For a pair of finite range observables  $m_l, m_{l'}$ , the susceptibility can be obtained from the free energy  
 183 as follows:

$$\chi_{ll'} = \frac{\partial^2 \mathcal{P}[\mathcal{H}]}{\partial h_l \partial h_{l'}} = \frac{\partial \mu[m_{l'}]}{\partial h_l} = \frac{\partial \mu[m_l]}{\partial h_{l'}} = \chi_{l'l} \quad (9)$$

184 It is also a standard result in ergodic theory (Green-Kubo formula) that the elements of the matrix  $\chi$   
 185 can be obtained via time correlations:

$$\chi_{ll'} = C_{l,l'}(0) + \sum_{s=1}^{\infty} C_{l,l'}(s) + \sum_{s=1}^{\infty} C_{l',l}(s). \quad (10)$$

186 Especially, for the diagonal term:

$$\chi_{ll} = C_l(0) + 2 \sum_{s=1}^{\infty} C_l(s) \quad (11)$$

187 **Remark 1:** The matrix  $\chi$  is at the core of our analysis and can be computed directly from data,  
 188 assuming that  $\mu$  is the empirical measure, that is without fitting the maximum entropy parameters.

189 **Remark 2:** In the case of memory independent MEM (e.g. Ising), and *only in this case*, (9) reduces  
 190 to  $\chi_{ll'} = C_{ll'}(0)$ . In general,  $\chi$  involves correlations at all times

192

## 193 Properties of the susceptibility matrix

194 Our method relies on the analysis of this matrix, which has the following properties:

195 (i) The set of all parameters fixes the statistical model. A slight variation  $\delta h_l$  of the sole weight  $h_l$   
 196 affects all the other monomials average. One can show that  $\delta \mu[m_{l'}] = \sum_l \chi_{l'l} \delta h_l + O(\delta h^2)$ . Thus,  
 197  $\chi$  is a linear response matrix.



- 198 (ii) It is symmetric and positive, thus with real positive eigenvalues, which can be arranged increas-  
 199 ingly  $\lambda_1 \geq \lambda_2 \geq \dots \lambda_k \geq \lambda_L > 0$ .
- 200 (iii) The set of  $(h_l)_{l=1}^L$  is a vector of  $L$  dimensions, which can be seen as a point in  $\mathcal{E} = \mathbb{R}^L$ . The set  
 201 of eigenvectors  $\mathbf{v}_k$  of  $\chi$  constitute an orthogonal basis of this space, where the  $k$ -th eigenvector  
 202  $\vec{v}_k$  is the  $k$ -th direction in the space  $\mathcal{E}$ .
- 203 (iv) The closest two points are in  $\mathcal{E}$ , the closest are the statistics they predict. As a corollary, trying to  
 204 fit empirical statistics, two models corresponding to “close” points might be indistinguishable as  
 205 they describe equally well the empirical statistics. The notion of closeness is however ambiguous  
 206 here and requires to define a proper metric. This is precisely what  $\chi$  does: it defines a metric  
 207 (called Fisher metric).
- 208 (v) From a statistical perspective,  $\frac{1}{\sqrt{\lambda_k}}$  gives the amplitude of second-order fluctuations in the es-  
 209 timation of coefficients  $h_l$  projected on direction  $\vec{v}_k$ . The smaller the eigenvalue, the larger the  
 210 amplitude. Finally, from the linear response perspective,  $\frac{1}{\sqrt{\lambda_k}}$  tells us how much a small variation  
 211 in the estimation of average of monomials affects the estimation of  $h_l$ .

212 The Susceptibility matrix (or Fisher matrix) is used here in order to study *both* the geometric  
 213 structure and the statistical fluctuations of the family of statistical models [24, 36, 23].

## 214 Distinguishable MEMC

215 Consider a spike train data set  $\omega_1^T$  consisting of  $T$  spike patterns generated by a biological neuronal  
 216 network. Given a set of  $L$  arbitrary observables  $\{m_l\}_{l=1}^L$  (possibly non-synchronous) we compute their  
 217 empirical averages from  $\omega_1^T$  in order to set the constraints and infer the maximum entropy parameters  
 218  $\mathbf{h} = (h_1, \dots, h_L)$  characterizing the MEMC. We may use these parameters to generate a sample  $\tilde{\omega}_1^T$  of  
 219 the inferred MEMC of same size  $T$  as the original data set. Considering the same set of observables  
 220 we can apply again the MEP to infer a new set of parameters  $\mathbf{h}'$  from  $\tilde{\omega}_1^T$ , which is expected to be  
 221 different from  $\mathbf{h}$  due to finite size sampling. Thus, the MEMC specified by  $\mathcal{H}_{\mathbf{h}}$  and  $\mathcal{H}_{\mathbf{h}'}$  cannot be  
 222 distinguished on the basis of a dataset of finite length. However, increasing the sample size, one ex-  
 223 pects the MEMC specified by the potential  $\mathcal{H}_{\mathbf{h}'}$  to get “closer” to the one characterized by  $\mathcal{H}_{\mathbf{h}}$ . This  
 224 idea can be rigorously formulated using large deviations techniques (see appendix).

225

226 **Definition** Consider two MEMC specified by  $\mathcal{H}_{\mathbf{h}}$  and  $\mathcal{H}_{\mathbf{h}'}$  within the same family of observables.  
 227 Then, given a dataset of length  $T$  and empirical averages sampled from the model specified by  $\mathcal{H}_{\mathbf{h}}$   
 228 and tolerance  $\epsilon > 0$ , we say that the MEMC with parameters  $\mathbf{h}$  and  $\mathbf{h}'$  are  $\epsilon$ -indistinguishable if:

$$-\ln \mathbb{P}(\mathbf{h} \approx \mathbf{h}') \leq \epsilon \quad (12)$$

229 The notation  $\approx$  stands for “inside a ball of radius  $\delta$ , for some small  $\delta > 0$ , as explained in  
 230 the supplementary material. This last property identifies an approximatively elliptical region of  $\epsilon$ -  
 231 indistinguishable models around each MEMC specified by  $\mathbf{h}$ , whose volume can be easily calculated  
 232 in the large  $T$  limit [41, 36].

## 233 Volume of indistinguishable models

234 Following Balasubramanian [41] two distributions  $\mu^{(1)}$ ,  $\mu^{(2)}$  are indistinguishable with tolerance  $\epsilon$  if  
 235  $-\ln \mathbb{P}[h^{(1)} \approx h^{(2)}] \leq \epsilon$ . If  $T$  is large enough, the set of indistinguishable distributions defines an  
 236 ellipsoid with a volume denoted by  $\mathcal{V}$  called *confidence volume*. Points inside the confidence volume  
 237 correspond to indistinguishable models within a tolerance  $\epsilon$ . When the sample size  $T$ , the model  
 238 dimension  $L$  (number of observables-parameters) and the tolerance  $\epsilon = -\log \kappa$  are fixed the volume  
 239 is:

$$\mathcal{V} = \frac{1}{\sqrt{\det \chi}} \left[ \frac{1}{\Gamma(\frac{L}{2} + 1)} \left( \frac{2\pi\kappa}{T} \right)^{\frac{L}{2}} \right]. \quad (13)$$

240 Therefore  $\log \mathcal{V} \propto -\frac{1}{2} \sum_{i=1}^L \log \lambda_i$ . We observe that the model estimation is better if the eigenvalues  
 241 of  $\chi$  are larger, which implies that there exists a set of eigenvalues that can be neglected given their  
 242 small magnitude, i.e. huge fluctuations impairing the model estimation. Then, instead of considering  
 243 the volume in the space of all parameters, let us consider the volume  $\mathcal{V}(k)$  of the projection in the  
 244 subspace spanned by the  $k$  first eigenvectors of  $\chi$ . We have:

$$\log \mathcal{V}(k) = \frac{1}{2} S_{\mathcal{H}}(k) - \log \Gamma\left(\frac{k}{2} + 1\right) + \frac{k}{2} \log \left(\frac{2\pi\kappa}{T}\right), \quad (14)$$

245 with:

$$S_{\mathcal{H}}(k) = - \sum_{i=1}^k \log \lambda_i, \quad (15)$$

246 where the eigenvalues  $\lambda_i$  are ordered decreasingly. In eq. (14), the second term,  $\log \Gamma(\frac{k}{2} + 1)$ , depends  
 247 only of  $k$ . The third term,  $\log(\frac{2\pi\kappa}{T})$  characterizes the effect of accuracy and finite sampling. Therefore,  
 248 the only term which depends on the statistical model (here characterized by the potential  $\mathcal{H}$ ) is  $S_{\mathcal{H}}(k)$ .  
 249 In particular, it depends on the number of neurons  $N$  and the range  $R$  of the potential.

250 As stated above, the inverse of the eigenvalues tells us how much a small variation in the estimation  
 251 of the parameters affects the statistics. For a large eigenvalue  $\lambda_k$ , a tiny variation in the direction  
 252  $v_k$  has a dramatic impact on the general statistics. On the opposite, small eigenvalues correspond to  
 253 sloppy dimension where even a big change in the corresponding direction has small impact. The notion  
 254 of stiff and sloppy dimension in statistics is not new and has been used by several authors, including  
 255 for the analysis of spike trains [25], but the treatment we propose, for MEM with spatio-temporal  
 256 interactions (in contrast to previous papers dealing with Ising model) is, to our best knowledge, a  
 257 novelty. Thus, using  $\chi$  as a metric to distinguish between models, we can find the optimal number of  
 258 dimensions of a MEM given data, which is the main goal in this paper.

## 259 Dimensionality reduction

260 In information geometry, one extends a family of parametric probability distributions to a manifold  
 261  $\mathcal{M}$  such that the points in  $\mathcal{M}$  are in a one to one relation with the probability distributions. The  
 262 parameters of the distributions can thus also be used as coordinates on  $\mathcal{M}$ .

263 For a fixed potential form (3), the MEMC parametrized by the coefficients  $\mathbf{h}$ , corresponds to a  
 264 point in the space  $\mathcal{E}$ . Equivalently, this point corresponds to a unique Markov measure. If the  $h_{ls}$  are  
 265 tuned independently from each others, the set of MEMC fully spans  $\mathcal{E}$ . However, when fitting data  
 266 from neuronal networks, either artificial or biological, one expects hidden relations between the  $h_{ls}$ ,  
 267 constrained by dynamics [13]. In this case, the MEMC spans a manifold  $\mathcal{M}$  in  $\mathcal{E}$ , of (presumably)  
 268 quite lower dimension.

269 To estimate the dimension of  $\mathcal{M}$ , i.e, the dimension of the manifold of  $\mathcal{E}$  sufficient to explain the  
 270 data with a minimal redundancy we use the following argument. Considering the equation (15) as  
 271 the eigenvalues  $\lambda_k$  increases, there will be one or more  $ks$  at which  $S_{\mathcal{H}}(k)$  is expected to become  
 272 bigger than the sum of the other two terms of (14), which are both negative. This means that, for  
 273 increasing  $k$ ,  $\log \mathcal{V}(k)$  will first decrease then it will increase, yielding at least one minima on the  
 274 function. There is therefore a critical value of  $k$ , denoted by  $k_c \equiv k_c(\epsilon, T)$ , which characterizes the  
 275 optimal dimension for which the *volume is minimal*. The value of  $\epsilon$  belongs to some interval; outside  
 276 this interval  $\log \mathcal{V}(k)$  is convex or concave having only trivial minima. Inside this interval, we obtain a  
 277 set of  $k_c \equiv k_c(T)$  minimizing the volume, which characterize the number of dimensions ensuring that  
 278 the model indeterminacy is minimized (see figure 1). Additionally,  $k_c$  provides a rough estimate of  
 279 the dimension of  $\mathcal{M}$ .

## 280 General Method Description and Applications to Synthetic Data

281 In order to test the method in a context where the ground truth is known, we artificially generated  
 282 spike trains from MEMs using different sets of observables:

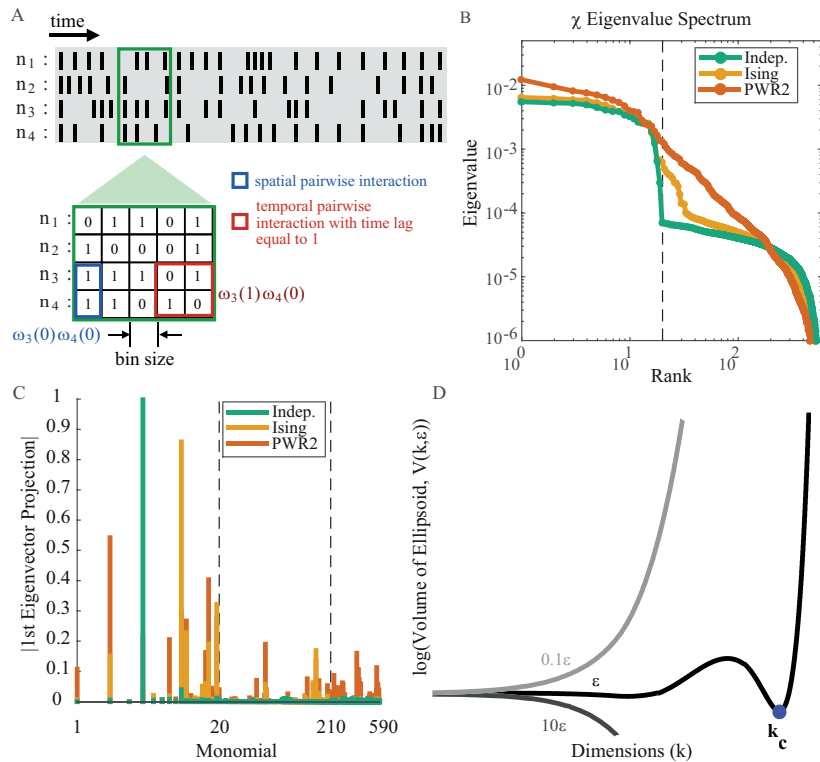

**Figure 1: Dimensionality reduction framework overview.** A: Raster representing the binary activity of  $N = 4$  neurons (rows) over time ( $T$ ). Green square shows a slice of this raster. For this raster 2 types of pairwise interactions are defined: spatial interactions (blue) and temporal interactions with  $R = 2$ , i.e. one time-step between spikes (red). Spatial interaction is exemplified as  $\omega_3(0)\omega_4(0)$  (both neurons firing at the same time) and  $\omega_3(1)\omega_4(0)$  (neuron 3 firing one bin after neuron 4). B: Susceptibility matrix eigenvalue spectrum in log-log scale for Independent (green), Ising (orange) and Pairwise Range=2 (PWR2, red). Black vertical dashed line denotes the network size ( $N = 20$ ). Indep. raster has a sharp cut-off close to the network size; Ising has a cut-off few eigenvalues beyond the network size ( $k_c = 29$ ); PWR2 shows a monotonic decay of the eigenvalues magnitude, without a clear cut-off. C: First eigenvector absolute projections for Independent (green), Ising (orange) and Pairwise Range=2 (PWR2, red) rasters. Left-most vertical dashed line is the limit between spike rates and spatial interactions monomials while the right-most is the limit between spatial and temporal interactions monomials. Indep. raster projects only on rates monomials, while Ising projects on rates and spatial interactions, but not on temporal ones. PWR2 projects on the tree types of monomials. D: Log of the volume of indistinguishable models,  $\log \mathcal{V}(k, \epsilon)$  as the degrees of freedom ( $k$ ) increases. The volume reaches a minimum (blue dot) for  $k = k_c$ . Increasing  $k$  beyond  $k_c$  makes the volume explode. Increasing/decreasing the error ( $\epsilon$ ) one order of magnitude yields to strictly increasing or decreasing functions, where volume minimization is trivial and uninformative.

- 283 1. Independent model: This model considers that neurons are independent, i.e. it only contains  
 284 self-interactions (firing rates). The parameters of the potential control the firing rate of each  
 285 neuron. A rate model with  $N$  neurons has therefore  $L = N$  parameters. We call this model  
 286 Indep. to alleviate notations. The potential for this model reads:

$$\mathcal{H}(\omega(0)) = \sum_{i=1}^N h_i \omega_i(0)$$

- 287 2. Ising model: This model considers firing rates and pairs of neurons firing at the same time  
 288 (spatial). There is no interaction between spikes at different times. Considering  $N$  neurons, the  
 289 model has  $L = N + \frac{N(N-1)}{2}$  parameters. The potential for this model reads:

$$\mathcal{H}(\omega(0)) = \sum_{i=1}^N h_i \omega_i(0) + \sum_{i,j=1}^N J_{ij} \omega_i(0) \omega_j(0)$$

- 290 3. Spatio-temporal pairwise interactions model with memory depth 1: This model considers firing  
 291 rates, pairs of neurons firing at the same time (spatial) and also pairs of neurons firing with one



292 time-step delay between them (temporal). We call this model PWR2. Considering  $N$  neurons,  
 293 this model has  $L = N^2 + \frac{N(N-1)}{2}$  parameters (temporal self-interactions are not considered).  
 294 The potential for this model reads:

$$\mathcal{H}(\omega_0^1) = \sum_{i=1}^N h_i \omega_i(0) + \sum_{i,j=1}^N [J_{ij} \omega_i(0) \omega_j(0) + J'_{ij} \omega_i(0) \omega_j(1)]$$

295 Note that, in contrast to  $J_{ij}$ s,  $J'_{ij}$  are not symmetric.

296 4. Scaled PWR2: We multiply the potential  $\mathcal{H}$  by a factor (corresponding to an "inverse tempera-  
 297 ture"). In our experiments we use  $\beta = \{0.4, 0.6, 0.8, 1.2, 1.4\}$ .

## 298 Results

299 We apply our method to study the critical dimension ( $k_c$ ) of synthetic spike trains of size ( $N = 20$ ,  
 300  $T = 10^6$ ) generated from random potentials corresponding to the Independent, Ising and PWR2  
 301 models. We generate 100 different rasters of each using the same set of parameters for each MEM. For  
 302 each spike train, we compute the  $\chi$  matrix *using the observables of the PWR2 model*, that is, we over  
 303 fit when data are generated by an Independent or an Ising and, then, obtain the respective eigenvalue  
 304 spectra.

305 We show in Fig 1B, the spectrum of  $\chi$ . The entries of this matrix are estimated from data  
 306 considering three different cases. First data was generated by a PWR2 model (red curve); in the  
 307 second case, data comes from an Ising model (orange); in the last case data comes from an Independent  
 308 model (green). In all cases, the dimension of  $\chi$  is the same, but, in the independent and Ising case,  
 309 we are overfitting the estimation, as for the independent model firing rates are enough to fit the data,  
 310 and for the Ising model rates and pairwise interactions are enough.

311 The difference in the three cases is clearly seen in the spectrum of  $\chi$ . Moving along the spectrum  
 312 from left to right (increasing index  $k$ , decreasing the magnitude of the eigenvalue  $\lambda_k$ ) we observe a  
 313 first sharp decrease (*cut-off*) at  $k = N$ , for the Indep. (Fig 1B, black) and Ising rasters.

314 In addition to the differences on the eigenvalue spectrum, the functional relationships between the  
 315 monomials change depending on the underlying statistics, as exemplified by the first eigenvector of  
 316 the corresponding  $\chi$  matrix for each raster (Fig 1C). The Independent model shows large projections  
 317 only on the monomials related to spike rates, while showing negligible projections on the pairwise  
 318 monomials. The Ising model shows large projections as well on the spike rates monomials but in  
 319 addition shows some projections on the spatial interactions monomials. Finally, the PWR2 raster has  
 320 projections on all the monomials, reflecting in part its underlying statistics. Thus, the differences on  
 321 the energy function are captured both by the eigenvalues spectrum and also by the structure of the  
 322 corresponding eigenvectors.

323 In order to illustrate the volume of indistinguishable MEM,  $\mathcal{V}(k, \epsilon)$ , we computed it at different  $\epsilon$   
 324 and  $k$  finding some functions with non trivial minima, suggesting a reducible MEM (i.e.  $k_c < L$ ). The  
 325 presence of a cut-off on the eigenvalue spectrum shows that there is a value of  $k$  where the confidence  
 326 volume is minimal (Fig 1D), i.e., where the model is more accurately determined. This point is highly  
 327 non trivial and captures somewhat the role of spatio-temporal interactions on second order statistics<sup>1</sup>.

328 Finally,  $k_c$  is conditioned to the tolerance value  $\epsilon$  as shown on Fig 1D. Increasing or decreasing  $\epsilon$  one  
 329 order of magnitude yields functions with trivial minima. This constrains the search of the minima to a  
 330 subset of  $\epsilon$  values. Extending the results for different values of  $\epsilon$  shows that the number of dimensions  
 331 related to the minimal volume decays monotonically with the accuracy ( $\kappa = -\log \epsilon$ ) until it reaches  
 332 an inflection point; this inflection point is the  $k_c$  that we use as the number of relevant dimensions  
 333 (Fig. 2).

<sup>1</sup>Christoffel coefficients can be computed from the metric  $\chi$ , giving thus access to the local information geometry and higher order statistics [24]

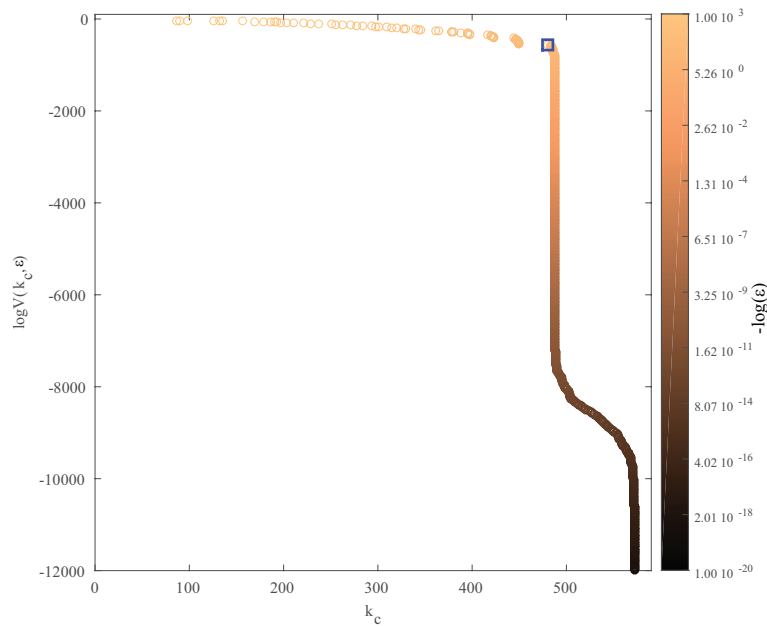

Figure 2: **Finding  $k_c$  on the set of convex volume functions.** The volume at the minimum and its corresponding  $k_c$  and  $\kappa$  ( $-\log \epsilon$ ) values. There are many convex functions and corresponding  $k_c$  that we could use, but given that we are looking for a cut-off, the actual  $k_c$  used is the last  $k_c$  before the inflection point (blue square) on the  $\log \mathcal{V}(k_c, \epsilon)$  vs  $k_c$  curve, representing a trade-off between maximal number of dimensions, the highest accuracy and the minimal volume as possible. This is the method used to choose the  $k_c$  for all the data analyzed.

### 334 $k_c$ values on the independent and spatio-temporal correlated cases

335 Using the synthetic data, we evaluated how the optimal dimension given by  $k_c$  depends on the un-  
 336 derlying statistics of neural data. Considering the  $k$  biggest eigenvalues, we computed the log of the  
 337 volume  $\mathcal{V}(k, \epsilon)$  (14) and compute its minimal value obtaining  $k_c$  (Fig 3A). The values of the parame-  
 338 ters of the underlying MEM related to firing rates and to pairwise interactions were randomly chosen  
 339 from a normal distribution with mean -5 and -1, respectively, and 1 standard deviation. We took one  
 340 set of parameter for a PWR2 MEM and to obtain the Independent and Ising rasters, we kept only  
 341 the parameters related to firing rates in the former and the ones relates to firing rates and spatial  
 342 interaction in the latter. For this example we observe the following:

343 In the case of independent statistics, the value of  $k_c$  is closely related to the network size ( $k_c =$   
 344  $19 \pm 0$ ). In this example, one neuron has a very low firing rate ( $\sim 10^{-5}$ ) compared to the others  
 345 ( $> 10^{-4}$ ). This explain the sharp cut-off at this neuron value. On the opposite, in the case of PWR2  
 346 the number of optimal dimension is  $k_c = 447 \pm 7.00$  (see Fig 3B). The intermediate case, Ising, shows  
 347 few number of dimensions more than  $N$ , but much less than  $L(590)$ .

348 Interestingly, even when the number of dimension for the PWR2 and Ising is larger than the  
 349 Independent case, the percentages of the optimal number of dimension relative to the total number  
 350 of dimensions is smaller for them, compared to Indep. as shown in Fig 3C. This shows that our  
 351 method can detect how many dimensions are needed for a MEM to fit data respect to underlying  
 352 raster statistics.

353 For the Indep. case we found that  $k_c$  corresponds almost to the full dimensionality of the underlying  
 354 model ( $L = 20$ ), while Ising can be highly reduced respect to its full dimensionality. For PWR2  
 355  $k_c$  corresponds to approximately 75% of the full underlying model dimensionality (Fig 3CB, inset),  
 356 possibly related to finite size sample effects (events that are unlikely to be observed in finite time). So,  
 357 for these examples, the effective dimensionality ( $k_c$ ) found by this dimensionality framework increases  
 358 with the number of terms of the underlying statistics defined by the energy function.

### 359 $k_c$ depending on the the network size and recording length

360 We evaluated the impact of the number of neurons  $N$  and the raster duration  $T$  on the estimation of  
 361  $k_c$ . We focus only on the Independent and PWR2 case, leaving Ising outside this analysis.

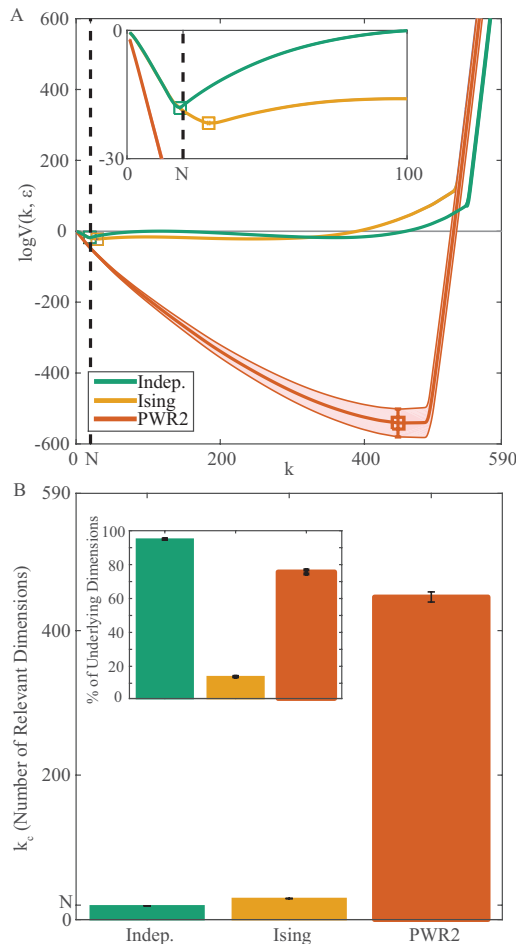

**Figure 3: Dimensionality reduction by minimization of the volume of indistinguishable models.** A: log of volume of indistinguishable models ( $\log \mathcal{V}$ ) as function of the number of dimensions ( $k$ ) at the maximal accuracy that yields no trivial minima ( $\kappa = 1336.6 \pm 16.00$  for Indep.,  $1250.6 \pm 101.86$  for Ising and  $108.1 \pm 108.1$  for PWR2). Thick solid lines are averages, shaded area is  $\pm 1$  s.d. of the 100 samples and black vertical dashed line is the network size ( $N = 20$ ). The minimum of this function (squares) is the optimal number of dimensions capturing the raster statistics at the given accuracy, i.e.  $k_c$ . Inset shows a zoom-in on the first 100 dimensions, focusing on the Indep. and Ising. minima. B: Summary of the number of dimensions for both statistical models. We found a close relationship between the underlying model dimensionality and the number of dimensions required for an optimal model. In this example,  $k_c$  is  $19 \pm 0$  for Indep.,  $29.16 \pm 0.37$ , and  $447 \pm 7.00$  (mean  $\pm$  std) for Indep. and PWR2, respectively. Inset:  $k_c$  as a percentage of the underlying model dimensionality. Indep. case show almost 100%, while Ising has  $\pm 14\%$  of reduction and PWR2  $\pm 75\%$ .

362 Fixing the neural population size ( $N = 20$ ), we first varied the recording length from  $T = 10^2$   
 363 up to  $T = 2 \cdot 10^6$  bins and observed the effect obtained (see Fig 4A) on the  $\chi$  spectrum for the  
 364 Independent (left) and PWR2 (right) cases. In the independent case, the first cut-off of the spectrum  
 365 is increased while the value of  $T$  increases. On the opposite, in the case of PWR2 the cut-off is  
 366 not observed, indeed, the separation in the spectrum of dimensions related to neuron firing rates or  
 367 combined activation is less evident than the Indep. case. Additionally, we obtained the  $k_c$  value for  
 368 each value of  $T$  as shown in Fig 4B. In both cases, we can consider that the estimation of  $k_c$  converges  
 369 for values of  $T$  over  $10^6$  bins.

370 Fixing now the value of  $T = 10^6$ , we evaluated the effect of the network size  $N$  on the estimation  
 371 of  $k_c$  for the Independent and PWR2 case. As shown in Fig 4C, increasing the number of neurons  
 372 increases the model dimensionality as well as  $k_c$ . Remarkably, the shape of the spectrum remains the  
 373 same, suggesting finite size scaling [43]. Finally, Fig 4D shows how the maximal dimensionality of the  
 374 model  $L$  and the value of  $k_c$  depends on the network size  $N$ .

375 For small neural populations sizes,  $k_c \sim L$ , but as  $N$  increases, the number of possible interactions  
 376 ( $L$ ) grows, requiring longer recording lengths. Black circle denotes the network size used in retinal  
 377 spike train data shown in this article ( $N = 50$ ).

378 The fact that a larger number of neurons  $N$  requires longer recording lengths brings as consequence  
 379 a value of  $k_c$  departing from  $L$ . As either the simulated or real data has a finite length  $T$ , increasing

380  $N$  generate an increasing number of unobserved monomials, or, monomials with very low occurrence  
 381 probability, reducing the effective  $\chi$  matrix rank. The effect of unobserved or very low empirical  
 382 probability events on  $\chi$  and, consequently, on  $k_c$  estimation is detailed in the next subsection.

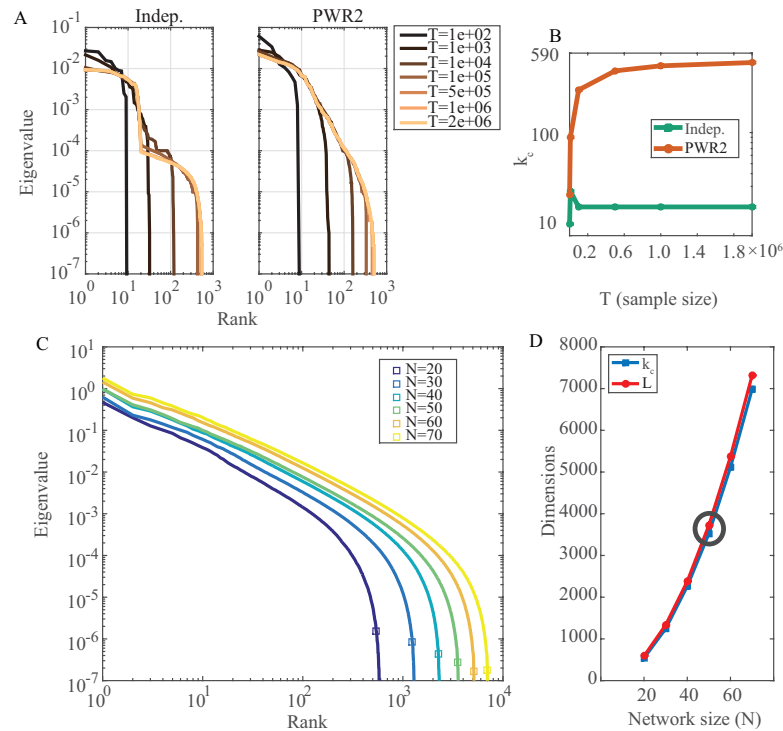

Figure 4: **Method dependence on recording length and network size.** A: Spectra of Indep. and PWR2 rasters using different recording lengths (colors) for  $N = 20$ . B:  $k_c$  values for both rasters at different recording length. Using  $T \geq 10^6$  is enough to have good  $k_c$  estimations. C: Spectra for random PWR2 rasters with increasing network size ( $N$ , colors) with the corresponding  $k_c$  on it (squares). The length of the spectrum (number of eigenvalues) changes because of the increase of model parameters, but the shape of the spectrum remains the same given the constant underlying model. D:  $k_c$  value for each network size (blue) and corresponding maximal dimensionality ( $L$ , red). Black circle denotes the raster size that we use in biological recordings ( $N = 50$ ).  $k_c \sim L$  at almost all network sizes, but as  $N$  increases, the number of possible interactions grows, requiring longer recording lengths, making  $k_c$  diverge from  $L$ .

### 383 A measure of "code compressibility"

384 We now relate  $k_c$  to a notion of "neural code compressibility". We start from an important remark:  
 385 as a sum of covariance matrices,  $\chi$  is non negative. Nevertheless, it can have many zero eigenvalues  
 386 for two distinct reasons:

- 387 1. There are hidden linear dependencies between the coefficients  $h_l$ . This is typically due to an  
 388 hidden structure in the dynamics which has generated the data. An explicit example is provided  
 389 in [13] where the  $h_l$  of a neuronal network model are computed as a function of the  $W_{ij}$ s (synaptic  
 390 weights) and stimulus. These eigenvalues are intrinsic to the dynamics and constitute somewhat  
 391 the redundant part of the information that we want to remove to "explain" data. We note  $d_N$   
 392 the number of these eigenvalues.
- 393 2.  $\chi$  is computed from finite rasters. Here, some monomials have zero empirical value when the  
 394 corresponding event do not appear in the empirical raster. If  $m_l$  is one of these unobserved  
 395 monomials we have  $\pi(m_l) = 0$  and,  $\forall l', \pi(m_l m_{l'}) = 0$ , where  $\pi$  is empirical probability. We call  
 396 this type of events Unobserved Events ( $U_E$ ). As a consequence,  $\chi_{ll'} = 0, \forall l'$  and the row  $l$  of  $\chi$   
 397 has zero entries. Consequently, this row generates, in the spectrum of  $\chi$ , a zero eigenvalue.

398 We have therefore  $\mathcal{R} + d_N + U_E = L$  where  $\mathcal{R}$  is the dimension of the image of  $\chi$ . In general  $k_c < \mathcal{R}$   
 399 because, after the cut-off there are eigenvalues, small, but nevertheless positive. If the cut-off is sharp,  
 400 as we observe,  $\mathcal{R}$  is very close to  $k_c$  though. On this basis we define the "compressibility" of the code

401 as:

$$C = L - k_c - U_E \quad (16)$$

402 For sharp cut-off it is very close to  $d_N$  which precisely reflects the irrelevant dimensions in the space  
403 of parameters, corresponding to hidden dependencies.

#### 404 **How do $k_c$ and $C$ depend on the raster density.**

405 Using the aforementioned approach to dissect the relevant from the irrelevant dimensions, we aim to  
406 study the dependency between the raster density and code compressibility given a spatio-temporal  
407 MEM imposed to data. We consider neural density (or, conversely, sparsity) as the number of spikes  
408 of a raster divided by the number of bins of the raster. This density depends on many factors  
409 as the excitatory-inhibitory balance, network connectivity and stimuli, among others. Very dense  
410 neural responses could produce artificial neural correlations beyond the underlying statistics. On the  
411 opposite, very sparse responses could not provide enough information to fairly recover the correct  
412 empirical statistics of complex events (pairwise with time delays). Having this in mind we generated  
413 synthetic data with different levels of density and estimated  $k_c$  under these different regimes.

414 We generated different synthetic sets of neural data where the density of the response varies. To  
415 do this, starting from PWR2 model, we generated five new responses scaling the parameters of the  
416 MEM by a factor  $\beta = \{0.4, 0.6, 0.8, 1.2, 1.4\}^2$

417 The effect of increasing the parameter  $\beta$  has therefore a tendency to spread the distribution of  
418 parameters  $h_l$  as shown in Fig 5A enlarging its variance, where the parameters  $h_l$  associated to firing  
419 rates are represented in blue, and those associated to spatio-temporal interactions in red. As expected,  
420 scaling the model parameters by low values of  $\beta$  condense the parameters distribution.

421 Similarly, monomial probabilities are also affected by the  $\beta$  parameter (see Fig 5B). As expected,  
422 decreasing the value of  $\beta < 1$  tends to equalize the probabilities of the monomials generating a very  
423 dense neural response. On the contrary, higher values of  $\beta > 1$  tend to maximize the energy generating  
424 configurations of the response with less variability (sparse distribution). High values of  $\beta$  diminishes  
425 therefore the probability of occurrence of those monomials whose  $h_l$  value is negative while it increases  
426 the probability of monomials (spike events) with a positive  $h_l$ .

427 Increasing  $\beta$  value causes two main effects on the eigenvalue spectrum of the  $\chi$  matrix (see Fig 5C):  
428 (i) the spectrum is flatter as  $\beta$  decreases, (ii) there are more zero eigenvalues, i.e.  $U_E$  increases. Both  
429 effects come from the fact that the raster sparsity decreases with  $\beta$ , decreasing the events probabilities  
430 as well. Thus, this low probability events are reflected on the increase of  $U_E$  due to finite sampling  
431 and also on the flatness of the spectrum, given that the few observed events have similar probabilities.

432 Decreasing the value of  $\beta$  below 1 decreases the value of  $k_c$ . In a similar manner, values of  $\beta$  larger  
433 than 1 monotonically decrease the value of  $k_c$ . Then, moving away from  $\beta = 1$  reduces  $k_c$ , but the  
434 reasons for the first case are different from the second. To illustrate this, Fig 5D shows the mean  
435  $k_c$  value obtained for 10 different rasters (sharing the same underlying parameters and  $\beta$ ) as a circle  
436 and 1 s.d as error bars. As we previously mentioned, small values of  $\beta$  produces a very dense neural  
437 response, that apparently can be condensed in a few dimensions ( $k_c = N$  for  $\beta = 0.4$ ). On the second  
438 case, for  $\beta > 1$  many events have very low probability, increasing  $U_E$ , which will decrease  $k_c$ . This  
439 difference is illustrated on figure 5E), where larger values of  $\beta$  generates responses with large  $U_E$ .

440 For values of  $\beta < 1$  we see almost no difference between Fig 5D and Fig 5E, meaning that  $k_c$  is an  
441 indicator of data compression not affected by the unobserved events (that are negligible). Nevertheless,  
442 the data compression detected by a low value of  $k_c$  is artificial because most of the correlations are  
443 induced by the effect of a high activation in the neural population. On the opposite, in the cases  
444 where  $\beta > 1$  the unobserved events become significant and the low value of  $k_c$  obtained in Fig 5D was  
445 mainly due to the number of non-zero dimensions of the  $\chi$  matrix without compression.

---

<sup>2</sup>Increasing  $\beta$ , known in physics as inverse temperature, amounts to favor configurations maximizing the energy, i.e., monomials with high positive terms. On the opposite, decreasing  $\beta$  (increasing temperature) tends to equalize probabilities of patterns. Note that, in contrast to statistical physics, energy is maximized, not minimized, because we don't have the minus sign in front of the potential, in the Gibbs distribution.

446 Thus, from this approach, the full dimensionality of the model imposed to data can be dissected  
 447 on the effective dimensionality,  $k_c$ , and the compressibility,  $\mathcal{C}$ , reporting the level of redundancy that  
 448 the model can capture from data.

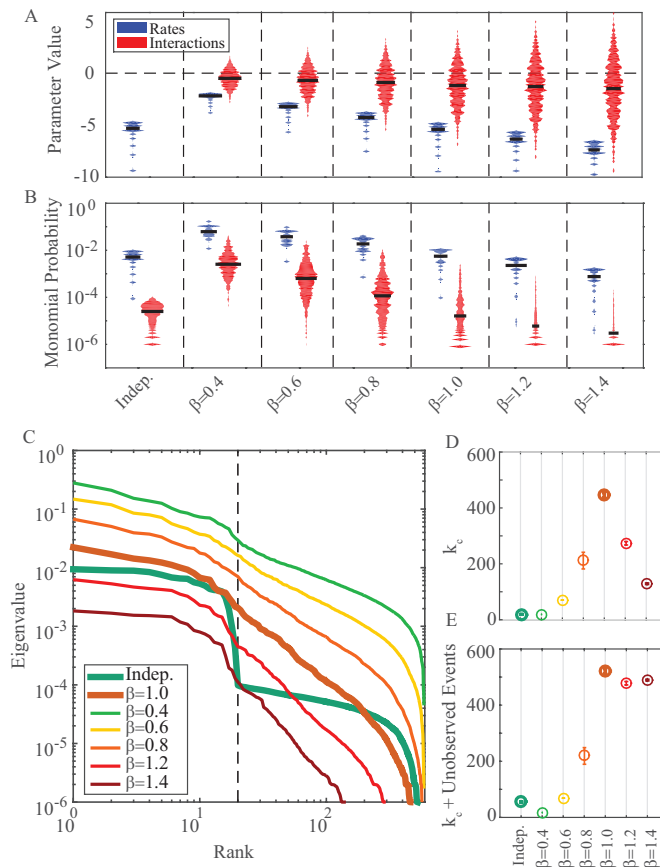

Figure 5: **Dimensionality reduction on scaled PWR2 statistics.** A: Underlying parameters distribution, split by firing rates (blue) and pairwise interactions (red). The bigger the scaling factor  $\beta$ , the more negative the rates parameters and the wider the interactions parameters distribution.  $\beta = 1$  is the original PWR2 raster. The first column show the Independent raster as a reference. B: Corresponding monomials probabilities for the scaled rasters, split between firing rates and interactions, as in A. We see that increasing  $\beta$  has the effect of decreasing both rates and pairwise interactions probabilities, reaching the point where many pairwise interactions vanish ( $\beta > 1$ ). C: Corresponding  $\chi$  eigenvalue spectra (average out of 10 rasters for the scaled rasters). Increasing  $\beta$  flattens the spectrum, the spectrum offset and the number of eigenvalues above the minimal observed probability ( $1/T$ ). D:  $k_c$  values for the scaled rasters. None of the scaled rasters shows  $k_c$  value as the one obtained for the original PWR2 raster. Dots represent the average of  $k_c$  over 10 different rasters with the same underlying parameters. Error bars represent 1 s.d. E: Average  $k_c$  values plus the number of unobserved events ( $U_E$ ). For  $\beta > 1$  adding the unobserved events yields values close to the original PWR2 raster, showing that the dimensionality reduction obtained for those rasters is given mainly by the unobserved effects. For  $\beta < 1$  we have less unobserved events, so the dimensionality reduction obtained for those cases is given mainly by the increased density of the raster.

## 449 Dimensionality reduction on retina data

450 We are now interested in verifying if the properties found in synthetic data are scalable to real neural  
 451 data. We did it on retina data obtained for three different conditions: photopic spontaneous activity  
 452 (PSA), white noise (WN) and natural movie (NM).

453 Retina data was recorded in a 252-MEA system obtaining the response of 867 retinal ganglion cells  
 454 in four different pieces of *O. degus* retina. Additionally, we generated shuffled version of the real data  
 455 to compare the value of  $k_c$  and  $\mathcal{C}$  in the two cases, where the shuffled version maintained the firing  
 456 rates of each neuron destroying the spatio-temporal correlations. In Fig 6 we show the distribution  
 457 of the empirical monomials present in real versus shuffled data. Monomials related to firing rates  
 458 are shown in blue and those related to spatio-temporal correlations are shown in red. Interestingly,  
 459 distribution of the pairwise interactions probabilities of the empirical recordings and their shuffled  
 460 version for all stimuli are not significantly different (bin 10ms, Mann-Whitney test  $P > 0.05$ ), so we



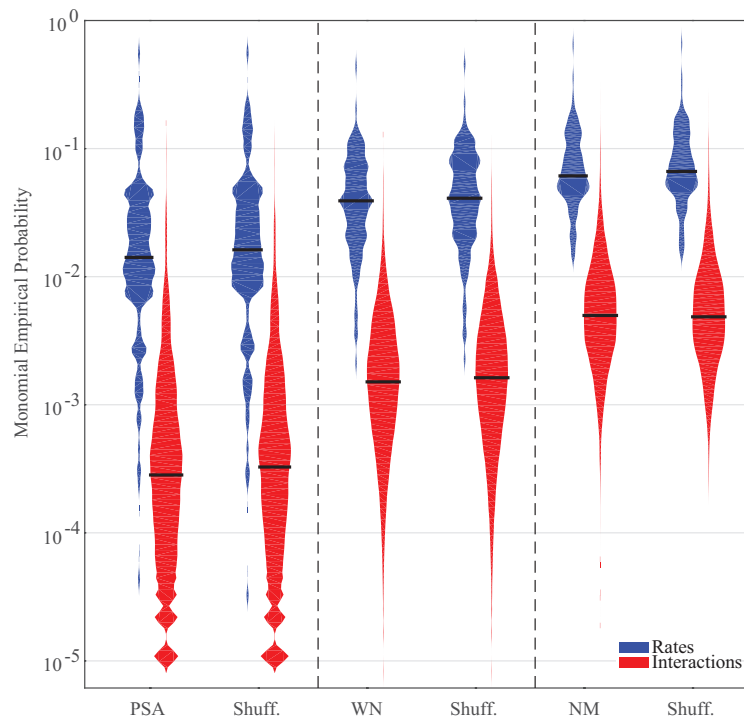

Figure 6: **Distribution of firing rates and pairwise interactions.** Violin plot of the firing rates (blue) and pairwise interactions (red) are shown for the 3 stimuli used and their corresponding shuffled version using a bin of 10ms (black horizontal line is the median). Both type of monomials increases with the stimuli high-order correlation. Note that the shuffled version reproduces the distribution of the pairwise interactions observed probabilities, even when the temporal structure of the raster is destroyed. This doesn't imply that the linear dependencies between MEM parameters are kept.

461 don't expect big differences on monomials empirical probabilities, but we do expect differences on the  
 462 linear dependencies between them. Also from Fig 6 we observe that the highest activity, both for  
 463 firing rates and spatio-temporal interactions, is obtained for NM, followed by WN and then by PSA.  
 464 Thus, we modify both the raster density and the hidden dependencies of the neural activity by means  
 465 of stimuli, where, in this case, the raster density increases with the stimuli high-order correlations.

#### 466 Experimental versus shuffled spectrum

467 We computed the  $\chi$  eigenvalue spectrum of 30 random sub-networks (i.e. sub-samples of the entire  
 468 population) of  $N = 50$  from the total number of neurons recorded in each of the four experiments,  
 469 under the 3 stimuli conditions. According to our synthetic rasters experiments, for  $N = 50$  and  
 470  $T \sim 10^6$  we can get reliable  $k_c$  estimates (Fig 4D), which fits with our experimental recordings. Same  
 471 procedure was applied to shuffled data.

472 Similar to what we obtained for scaled synthetic rasters (Fig 5C), we see that the spectrum is  
 473 flatter, and the vanishing eigenvalues (below  $1/T$ ) of  $\chi$  spectrum increases with the raster density,  
 474 which is driven by the stimuli (Fig 7A). The size of the network ( $N = 50$ ) is represented by a vertical  
 475 dashed line. In real data, only WN condition shows a cut-off in the spectrum close to  $N$ . Interestingly,  
 476 in shuffled data both NM and WN present this cut-off near  $N$ , suggesting that in the experimental  
 477 recordings there are significant linear dependencies between monomials that are not present in the  
 478 shuffled version (see Fig 7B). Specially, NM shows a smooth decay of the spectrum, similar to the  
 479 observed for PWR2, which is highly modified when the raster is shuffled, having a sharp cut-off close  
 480 to  $N$ . So, even when the distribution of the probabilities of firing rates and pairwise interaction remain  
 481 the same after the shuffling procedure (Fig 6), the linear dependencies between them are modified,  
 482 changing the shape of the spectrum, showing sharper cut-offs for all conditions.

#### 483 Computing $k_c$ for retinal ganglion cells spike trains

484 We computed  $k_c$  for spike trains of retinal ganglion cells obtained for different stimulus. For each  
 485 stimulus we generate different spike trains (experimental and shuffled) and we use different time bins

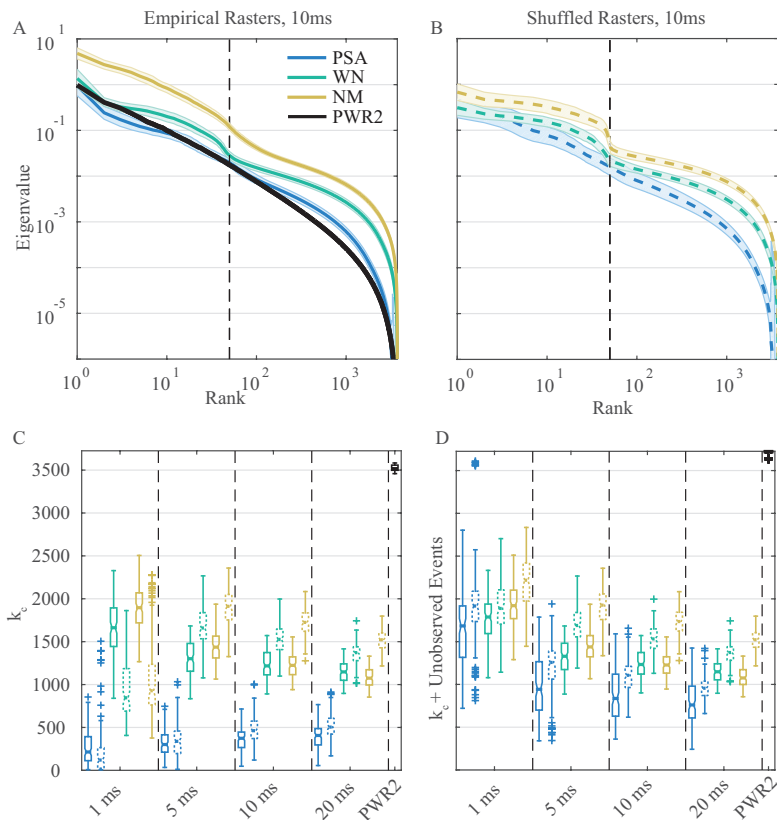

**Figure 7: Dimensionality reduction on RGC data.** A: Average spectrum (30 random sub networks plus 1 s.d., solid line and shaded area, respectively) of RGC data ( $N = 50$ ) under 3 different stimuli conditions, with 10ms bin size. Stimuli high-order statistics increases the spectra offset (the magnitude of the eigenvalues). Except for WN, there is no clear cut-off close to  $N$ . Black line is a random PWR2 raster of the same network size than the RGC raster plot. B: Same than A, but for the shuffled version of the empirical rasters in dashed lines. All of them show a clear cut-off close to  $N$  and, preserving the effects induced by stimuli high-order correlations, i.e. change on the first eigenvalue and offset. C: Box plots for  $k_c$  values for empirical (solid) and shuffled rasters (dashed). Given the absence of prior knowledge about the relevant timescales the brain uses to integrate retinal signals, we studied several bin sizes. For example, for 1ms,  $k_c$  is higher for shuffled data in all bin sizes, under all conditions. Stimuli high-order correlations significantly increases  $k_c$ . Also, neither of both type of rasters reaches the  $k_c$  values obtained for a PWR2 rasters, which shows almost no dimensionality reduction. For fast time scales (1 and 5ms),  $k_c$  increases with the stimuli-high order correlations, but at 10ms WN and NM are not significantly different and for 20 ms WN is larger than NM. D: Same as C, but corrected by the number of unobserved events. Now for all bin sizes the shuffled data has bigger values than the empirical one. Shuffled data has values almost a half than a PWR2 raster of the same size, regardless of the absence of linear dependences by construction. The effect of stimuli high-order correlations on the effective dimensionality remains.

486 to binarize the data: 1, 5, 10 and 20ms. As a global picture, the value of  $k_c$  in the real and shuffled  
 487 data increases as the activity of the network does (Fig 7C). This behavior is replicated for all the bin  
 488 sizes.

489 The  $k_c$  analysis on retinal data reveals that the RGC activity is not random, showing almost the  
 490 half of dimensionality compared to a random PWR2 with the same network size, which is shown in  
 491 black in the upper right corner of Fig 7C. Furthermore, even if the firing rates and spatio-temporal  
 492 events have the same distribution between real and shuffled data, the values of  $k_c$  obtained in the two  
 493 cases differ, the real value being always smaller than the shuffled version. For all the time scales (from  
 494 1 up to 20 ms) we observe that the value of  $k_c$  in the shuffled data is always higher than the one  
 495 obtained for real data. Additionally, for the shuffled data the value of  $k_c$  monotonically increases with  
 496 the activity. Similarly, the real data also presents a tendency to increase the value of  $k_c$  as the raster  
 497 density does; nevertheless the relation is inverted between WN and NM for bin sizes 10 and 20ms: in  
 498 these two cases the  $k_c$  value obtained for NM is smaller than the values obtained for WN.

499 In order to verify if the  $k_c$  values are actually associated to linear dependencies between neurons,  
 500 and not to unobserved event, we did the correction  $k_c + U_E$  as it was shown in Fig 7D. PSA has  
 501 the larger  $U_E$  values, showing a big difference between  $k_c$  and  $k_c + U_E$ . In general,  $k_c$  corrected by  
 502  $U_E$  decreases with the bin size, because the larger the bin, the more likely is to observe two spikes

503 on the same bin and less likely is to have unobserved events. As a consequence, this increases the  
504 apparent interdependence of RGC population activity (both for real and shuffled data). Specifically,  
505 we see that  $k_c$  increases with the stimuli high-order correlation for fast time scales (Mann-Whitney  
506 test,  $P < 10^{-5}$  for all comparisons). This suggests that for fast time scales the retina increases the  
507 number of coding channels as the stimuli high-order correlation increases. However, for medium time  
508 scales the picture changes, showing no significant differences between WN and NM for 10ms (Mann-  
509 Whitney test,  $P > 0.1$ ) and showing higher  $k_c$  values for WN than NM for 20ms (Mann-Whitney  
510 test,  $P < 10^{-5}$ ). This suggests that at larger time scales the RGC activity under NM becomes more  
511 interdependent than for WN, which could be related to the increased level of redundancy of NM  
512 compared to WN and the time scale that this redundancy is captured by the retina generating a  
513 redundant activity.

514 On the other hand, the shuffled data show higher  $k_c$  values for almost all the bin sizes and conditions  
515 (Mann-Whitney test,  $P < 10^{-4}$ ), except for 1ms where it is significantly smaller (Mann-Whitney test,  
516  $P < 10^{-4}$ ) and for PSA at 5ms, where they are not significantly different (Mann-Whitney test,  
517  $P > 0.1$ ). However, when corrected by the number of unobserved events (Fig 7D), the picture is  
518 the same for all bin sizes: shuffled data have always higher  $k_c$  values than the real ones (Mann-  
519 Whitney test,  $P < 10^{-6}$  and  $P < 0.01$  for WN at 1ms). This confirms that the RGC neural code has  
520 interdependences that can be mapped onto a lower dimensional space (i.e. compressed), compared  
521 to the shuffled version, that lacks of interdependences by construction. Yet, the  $k_c$  obtained for  
522 the shuffled raster is still very small (almost a half) compared to the random PWR2 raster, which  
523 suggests that just the firing rates distribution, i.e. the diversity of firing rates, introduces some non-  
524 random interdependences in the neural code, allowing compression. Finally, for medium time scales  
525 (10-20ms), shuffled data shows an increase of  $k_c$  (after the correction by  $U_E$ ) with the stimuli high-  
526 order correlation, on the opposite to empirical data, where at this time scales NM induces a lower  
527 dimensionality, compared to WN. This supports the idea that there are time scales where the stimuli  
528 redundancies are reflected on the retinal activity and that this timescale is not present anymore on  
529 shuffled data.

530 In sum, the density of the RGC rasters increases with the stimuli high-order correlations. Also,  
531 RGC neural code is highly compressible compared to a random raster of same network size. Even  
532 compared to shuffled data, the RGC neural code is more compressible. Furthermore, a significant  
533 compression can be achieved considering just the firing rates distribution of empirical data, suggesting  
534 an effect of the diversity of firing rates on the code compressibility. Although stimuli high-order  
535 correlations increase the raster density, this activity can be compressed on a lower dimension for  
536 NM than WN using a bin of 20ms. Thus, an increased raster density induced by stimuli does not  
537 imply necessarily more coding channels. Instead, an increased raster density could be mapped onto  
538 a low-dimensional hidden structure, as in the case of concomitance of dense activity and oscillations.  
539 Regarding the time scales,  $k_c + U_E$  is inversely proportional to the bin size for all stimuli. On the one  
540 hand, this could be due to the specific time scales at which more redundancy is present on the neural  
541 activity. On the other hand, this could be due to artifactual correlations induced by binning. Both  
542 scenarios are possible and not mutually excluding, however, the problem of binning neural data is far  
543 from being solved.

## 544 Discussion

545 In this paper we have proposed a method to reduce the dimensionality of MEM on artificial and  
546 biological spiking networks. It is grounded on information geometry via the matrix  $\chi$ , which charac-  
547 terizes how a small variation of parameters impacts the statistical estimations. The  $\chi$  matrix captures  
548 the interdependences between the neural code variables. After an eigen-decomposition process, the  
549 eigenvalue spectrum of  $\chi$  exhibits two cut-offs. The first one shows that, both in synthetic as well as  
550 in retina data, a large part is "explained" by the firing rates of the neurons. Conversely, the second  
551 cut-off (here called  $k_c$ ) reflects a non-trivial effect associated with higher order statistics. As the  
552 eigendirections on the right part of the second cut-off correspond to noise, the spectrum lying between  
553 the two cut-offs contains a relevant information associated to statistics of higher order.

554 The reduction of the MEM dimensionality is directly linked with data compression, obtained from  
555 the linear dependencies between variables of the MEM that reflects hidden (non linear) interactions  
556 between neurons. For example, our analysis in the case of synthetic rasters, where in contrast to retinal  
557 data both the firing rates and the pairwise interactions are defined randomly, shows a  $k_c$  value very close  
558 to  $L$  (maximal dimensionality). This demonstrates that if there are no linear relationships between  
559 the parameters by construction, the code is not compressible and we have almost one dimension per  
560 parameter. On the opposite, retina data shows a significant compression of  $\sim 50\%$ , as expected  
561 from a neural tissue where cells are driven by common inputs and cells are electrically coupled [26],  
562 increasing the level of dependency between them. This compression reduces the dimensionality of  
563 the MEM to a lower dimensional space, where each dimension is a linear combination of model  
564 parameters, characterizing the population activity by a set of independent dimensions representing  
565 the inner structure of the network activity.

## 566 Limits of the method

567 The first limitation of our method comes from the numerical approximation used to compute  $\chi$  matrix,  
568 which is obtained by summing monomials correlations at different time lags (Eq. 11). An exact  
569 exponential decay of correlation function with time will ensure the convergence of the series. But,  
570 because we are estimating correlations from finite rasters, it is hard to estimate correlations with large  
571 time lags and errors accumulate.

572 To truncate this approximation we need to consider a trade-off between temporal resolution and  
573 reduction of noise. To this end we use 4 time lags (i.e. 4 terms of the sum), which is equivalent to  
574 the double of memory depth used in the model ( $R = 2$ ). This numerical estimation of  $\chi$  also imposes  
575 limits on the method, given that considering too large  $R$ s will generate a  $\chi$  matrix that is governed  
576 by noise.

577 On the other hand, it is possible to compute  $\chi$  from the model parameters, requiring a previous  
578 model fitting step, as done by [25]. However, for  $N > 20$  and  $R > 1$  the MEM computation becomes  
579 prohibitive as the network size and the memory depth of the model increases. So, despite the numerical  
580 approximation and its intrinsic errors, computing  $\chi$  from the empirical monomials time correlations  
581 is the best approach we found to work with medium size networks and spatio-temporal constrains.

582 Nevertheless, without fitting the MEM model we miss information about the sign (positive or  
583 negative) and the magnitude of the interactions (weak or strong) defining the the network topology  
584 and statistics. However, the scope of this work was not to fit different models on data and test  
585 its performance (e.g. Bayesian or Akaike information criterion that takes into account the model  
586 parameters and likelihood [27]) neither study changes in network topology under different stimuli.  
587 Instead, we focus on exploring the geometrical properties of the MEM and its meaning in terms of  
588 the neural code redundancy and compressibility. As we presented here, these geometrical properties  
589 can be directly extracted from the  $\chi$  matrix without fitting a MEM.

## 590 $k_c$ is not one value, but a set of values

591 The main challenge this methodology introduces is the selection of  $k_c$ . The selection of  $k_c$  is related  
592 to the minimization of the so-called confidence volume, which not only depends on the number of  
593 dimensions given by  $k_c$ , but also on the imposed tolerance  $\epsilon$ . So, strictly speaking, the selection of  
594  $k_c$  depends on the tolerance  $\epsilon$  that the analyst decide to use based on equation 22 . However, here  
595 we used a criterion based on a trade-off between dimensionality and the minimal confidence volume  
596 ( $\log \mathcal{V}(k_c, \epsilon)$ ): as shown on Fig 2,  $\log \mathcal{V}(k_c, \epsilon)$  decays monotonically as  $k_c$  increases and  $\epsilon$  decreases,  
597 reaching an inflection point where even if we decrease the accuracy by orders of magnitude  $k_c$  remains  
598 almost unchanged. This means that we look for the minimal dimensions with the highest possible  
599 accuracy. Thus, our choice of  $k_c$  was not based on fixing a tolerance, but rather on relationship  
600 between the minimal confidence volume, the dimensionality and imposed accuracy.

## 601 Comparison with similar analysis on spike trains

602 To our knowledge, there is no previous work related to the analysis of the  $\chi$  matrix considering  
603 *spatio-temporal* pairwise interactions applied to neuronal networks.

604 The authors in [25] proposed a similar analysis considering only spatial interactions, i.e. the Fisher  
605 Information Matrix (FIM) for the Ising model on *in vitro*, *in vivo* and *in silico* networks. The work of  
606 [25] studies small neural networks (10 neurons), they looked for stiff neurons, which are related to stiff  
607 dimensions (the largest FIM eigenvalues), proposing that those neurons are the ones giving stability to  
608 the network, while the neurons involved on the sloppy dimensions (dimensions where the parameters  
609 can have significant changes without affecting the model) are the ones involved on plasticity, allowing  
610 the network to remodel its connections.

611 Similarly, using larger network sizes ( $N = 50$ ) and spatio-temporal interactions, our approach  
612 exploits the linear dependencies of neuron interactions (given by the  $\chi$  matrix) to find a minimal set  
613 of dimensions that better represents the neural code, which could be considered an equivalent to stiff  
614 dimensions present in [25].

615 To this end, we found two set of stiff dimensions: the ones before the first cut-off, related mainly to  
616 neuron firing rates and the second set, after the first cut-off, related to spatio-temporal interactions.  
617 According to our framework, the sloppy dimension would be the ones beyond  $k_c$ , but we could also  
618 interpret the first  $N$  dimensions as the stiff dimensions, the ones between  $N$  and  $k_c$  as the sloppy  
619 dimensions and the ones beyond  $k_c$  just noisy dimensions. This re-interpretation arises from the  
620 large magnitude difference between the first and second set of dimensions and is compatible with  
621 our previous description of compressibility: to represent data with the minimal set of dimensions we  
622 require both stiff and sloppy dimensions. So, we consider the sloppy dimensions as relevant, because  
623 we need them to "explain" data, while we consider the irrelevant dimensions as noise.

624 Recently, Battaglia et al [28], studying large scale networks between brain areas, proposed a concept  
625 called *Meta Connectivity*, which instead of analyzing the correlation between nodes of a network  
626 (the usual functional/effective connectivity analysis), focuses on the correlations between the network  
627 interaction along time. This means focusing not on the coupling  $\omega_i(0)\omega_j(0)$  between neurons  $\omega_i$  and  
628  $\omega_j$ , but focusing on the interactions between the couplings  $\omega_i(0)\omega_j(0)$  and  $\omega_k(0)\omega_l(0)$ . This provides  
629 information about instantaneous high-order correlation for at least 3 nodes of the network (e.g. case  
630 of  $i = k$ ) and captures the relationships between modules of network activity. Thus,  $\chi$  matrix is both  
631 a functional/effective connectivity matrix (the matrix entries related to the correlations between firing  
632 rates) and also a meta connectivity matrix (the matrix entries related to correlations between pair-  
633 wise interactions), which also includes information about the temporal interactions between network  
634 nodes and network modules. The extension of our analysis towards the understanding of the meta  
635 connectivity has never been applied to networks of neurons. It is a future research direction, where  
636 the focus is on the variability and dependence of the interactions of a network.

## 637 Stimuli-induced changes on RGC population activity

638 Retina data has significant high-order correlations, including pairwise spatial[2, 3], temporal [16]  
639 interactions, triplets [9] and groups of neurons [10]. These correlations have been widely studied  
640 under MEM, which can accurately reproduce the raster spatio-temporal patterns. Nevertheless, there  
641 has been no work devoted to reduce the MEM dimensionality considering the inner dependences  
642 between the population activity variables.

643 Here, as a proof of concept, we used retina data of a diurnal rodent under 3 different stimuli with  
644 different statistics, from photopic spontaneous activity (spatio-temporal uniform full field, no second  
645 order statistics), a spatio-temporal white noise (gaussian statistics) to a repeated natural movie (high-  
646 order correlations both on time and space). From our analysis, we know that these stimuli high-order  
647 correlations increases the magnitude of both the firing rates and the raster high-order correlations,  
648 even making silent cells to fire. This could be related to recruitment of specific cell types by the stimuli  
649 features (e.g. local contrast [29], optic flow, color [30], among others).

650 In general, most of the correlated activity observed in the retina could be attributed to the receptive  
651 field overlap between recorded RGCs and to shared common noise [31]. Additionally, electrical coupling



652 are highly present in the *O. degus* retina [26] inducing fast correlations between close cells. Also, there  
653 could be correlations driven by amacrine cells, but the mechanisms and roles of those cells on the  
654 *O. degus* retina is still unknown. The aforementioned causes of correlations modifies the pairwise  
655 spatio-temporal interactions observed in real data. Furthermore, we explored the presence of these  
656 correlated activity in the neural code. To do this we compared the results of recorded data with a  
657 shuffled version of it, which preserves the firing rates distribution. Interestingly, both data sets share  
658 the pairwise interactions probability distribution suggesting, in this case, that second order statistics  
659 can be preserved just fixing the firing rates distribution.

660 Finally, as a main conclusion, our method suggest that RGC activity has significant high-order  
661 statistics that are modified by stimuli, compared to shuffled data. Thus, this significant interactions  
662 on RGC data are the base of the increased compressibility compare to shuffled data.

## 663 Compressibility of the RGC code

664 In order to study the compressibility of the RGC code, we studied  $\chi$  spectrum and  $k_c$  for RGC under  
665 three stimuli conditions, finding that RGC population code adapts to stimuli conditions by changing  
666 the number of independent channels.

667 The first difference we found between stimuli was on  $\chi$  spectrum, which shows an increase on the  
668 offset, i.e. the eigenvalues increase their magnitude as the stimuli high-order correlation increases.  
669 We recall that the stimuli-high order correlation increases the raster density. But given the way  $\chi$   
670 is computed (see Eq. 11), the shape of the spectrum comes not only from the increased monomials  
671 probabilities, but also from the dependence between the set of MEM monomials, all of them cap-  
672 tured by the matrix. On the one hand, shuffled data also exhibit these differences on the eigenvalue  
673 magnitudes (Fig 7B), showing that eigenvalues magnitude are closely related to the raster density  
674 (also shown for synthetic data on Fig 5C). On the other hand, the differences between the cut-off for  
675 empirical and shuffled data would be related to the linear dependences between the monomials, that  
676 in the latter case are destroyed. Then, using shuffled data as a control, we suggest that the magnitude  
677 of the eigenvalue spectrum highly depends on the monomials probability (raster density) while the  
678 cut-off depends on the hidden linear dependencies between them.

679 The second difference we found between stimuli is on  $k_c$  and  $\mathcal{C}$  i.e. our approximation to the  
680 compressibility of the neural code. As expected from the stimuli statistics and retinal stimuli inte-  
681 gration,  $k_c$  and  $\mathcal{C}$ , are always lower for PSA than for the dynamic stimuli. This suggests that the  
682 network optimizes the number of dimensions required for coding the stimuli depending on the stimuli  
683 statistics. In terms of metabolic cost, a very redundant stimulus as PSA (which has the same spatial  
684 and temporal information all over the stimuli space), may be coded with less dimensions than stimuli  
685 with more independent components (less redundant), thus, optimizing the metabolic resources.

686 However, for bin sizes of 1 and 5ms we observe that  $k_c$  is higher for NM than for WN. This relation  
687 varies for larger values of bin sizes, such as 10 or 20ms. For bin sizes of 10ms WN has the same number  
688 of relevant dimensions than NM, while for 20ms WN has more dimensions than NM. So, for fast time  
689 scales, we face a non-optimal situation, because NM has more redundancies than the WN. It could be  
690 possible that at this time scales we are not capturing the inter-dependences of the neural code that are  
691 relevant for the brain. For example, at 20 ms bin size, we see the expected optimal effect: the system  
692 exploits the stimuli redundancies and exhibit more compression for NM than for WN. Coincidentally,  
693 many MEM on retina have been done using 20 ms as bin size [2, 3], which in our case is the bin that  
694 allows the highest compression. In addition, synthetic data shows that if the raster is too dense, the  
695 underlying statistics hides under the noisy activity, which could also be possible at large values of bin  
696 sizes. To control this situation we used shuffled rasters, which preserves the same raster density. In  
697 the shuffled rasters we see that  $k_c$  increases with the raster density, discarding the effect of density on  
698 the changes of dimensionality at higher bin sizes.

699 Thus, at large bin sizes, the interdependences of the neural code are responsible for the compression  
700 effect and not the raster density hiding some events. Nevertheless, we do not know in advance what  
701 time scale(s) is(are) actually relevant for the brain and neither if our assumptions about code optimality  
702 and the neural code variables (firing rate and spatio-temporal interactions) are right, so the choice of  
703 the bin size and code variables is still an open question and somewhat arbitrary.



704 Finally, our work is related to the idea that a stimuli-dependent network noisy spiking neurons  
 705 adapt its code according to noise and stimuli correlations [21], instead of using just one way of coding.  
 706 In our case, the stimuli-dependent network is a biological one, so we don't have access to modify the  
 707 noise of each neuron nor the network noise. Instead, we can just modify the stimuli correlations,  
 708 which changes the dimensionality of the code. This change in dimensionality could reflect the smooth  
 709 interpolation between encoding strategies: highly redundant stimuli evokes fewer dimensions than  
 710 stimuli which presents high-order correlations.

711 This suggests that the MEM dimensionality is also a measure of the code redundancies. The  
 712 analytic relationship between dimensionality reduction and the coding strategies require an extensive  
 713 mathematical and computational research that is not developed here, however, we provide an indirect  
 714 way of studying the interdependences of the neural code as the stimuli conditions changes.

## 715 Supplementary Material

716 **Gibbs measures in the sense of Bowen.** Consider a potential  $\mathcal{H}_h$  of range  $R \geq 2$ . A shift invariant  
 717 probability measure  $\mu$  is called a Gibbs measure (in the sense of Bowen) if there are constants  $M > 1$   
 718 and  $\mathcal{P}[\mathcal{H}_h] \in \mathbb{R}$  s.t.

$$M^{-1} \leq \frac{\mu[\omega_1^n]}{\exp(\sum_{k=1}^{n-R+1} \mathcal{H}_h(\omega_k^{k+R-1}) - (n+R-1)\mathcal{P}[\mathcal{H}_h])} \leq M \quad (17)$$

719 It is easy to see that the classical Boltzmann-Gibbs distribution is a particular case of (17), when  
 720  $M = 1$  and  $\mathcal{H}$  is a potential of range 1.

721  
 722 **Ruelle-Follmer theorem:** Suppose  $\mu'$  is a Gibbs measure for some potential  $\mathcal{H}_{h'}$ , and  $\mu$  is another  
 723 Gibbs measure. Then the relative entropy density:  
 724

$$d(\mu | \mu') = \mathcal{P}[\mathcal{H}_{h'}] - S(\mu) - \mu(\mathcal{H}_{h'}) \quad (18)$$

725 if  $d(\mu | \mu') = 0$ , we obtain the variational characterization of Gibbs measures (4).

726 Following [36], consider the potential  $\mathcal{H}_h = \sum_{l=1}^L h_l m_l$  associated with an ergodic Markov Chain  
 727  $\mu(P, \pi)$ . Consider a sample of  $\mu(P, \pi)$  of length  $n$  and the observables  $\{m_l\}_{l=1}^L$ . We may obtain  
 728 from the sample new maximum entropy parameters  $\mathbf{h}'$ . The probability that the maximum entropy  
 729 parameters  $\mathbf{h}'$  associated with an ergodic Markov Chain  $\mu'(P', \pi')$  get close to  $\mathbf{h}$  follow the asymptotic  
 730 relationship:

$$\lim_{\delta \rightarrow 0} \lim_{n \rightarrow \infty} -\frac{1}{n} \ln \mathbb{P} \left( |\mathbf{h} - \mathbf{h}'| \in \Delta\delta \right) = d(\mu | \mu') \quad (19)$$

731 where  $\Delta\delta = [-\delta, \delta]^K$ . Choosing  $\Delta\delta$  close to 0 we may formally rewrite the above relationship in the  
 732 form:

$$-\frac{1}{n} \ln \mathbb{P} \left( |\mathbf{h} - \mathbf{h}'| \in \Delta\delta \right) \xrightarrow{n \rightarrow \infty} d(\mu | \mu') \quad (20)$$

733 Thus, for large  $n$ ,

$$\mathbb{P} \left( |\mathbf{h} - \mathbf{h}'| \in \Delta\delta \right) \approx e^{-nd(\mu | \mu')}$$

734 Meaning that close-by parameters index very similar distributions [41].

735 Consider two maximum entropy Markov chains  $\mu(P, \pi)$  and  $\mu'(P', \pi')$  specified by  $\mathcal{H}_h$  and  $\mathcal{H}_{h'}$  respec-  
 736 tively. As both satisfy the variational principle, we have that the relative entropy (18) reads:

$$d(\mu | \mu') = \mathcal{P}[\mathcal{H}_{h'}] - \mathcal{P}[\mathcal{H}_h] + \mu(\mathcal{H}_h) - \mu(\mathcal{H}_{h'}) \quad (21)$$

737 Taking the expansion of  $d(\mu | \mu')$  around  $\mathbf{h}' = \mathbf{h}$  we obtain:

$$d(\mu | \mu') \approx d(\mu | \mu) + \sum_k \frac{\partial d(\mu | \mu')}{\partial h'_k} \Big|_{h'=h} (h_k - h'_k) + \frac{1}{2} \sum_{k,j} \frac{\partial^2 d(\mu | \mu')}{\partial h'_k \partial h'_j} \Big|_{h'=h} (h_k - h'_k)(h_j - h'_j)$$

738 Since  $d(\mu | \mu')$  is minimized at  $h' = h$ :

$$d(\mu | \mu') \approx \frac{1}{2} \sum_{k,j} \frac{\partial^2 d(\mu | \mu')}{\partial h'_k \partial h'_j} \Big|_{h'=h} (h_k - h'_k)(h_j - h'_j)$$

739 Taking the second derivative of  $d(\mu | \mu')$  from (21), we obtain:

$$\chi^{kj} = \frac{\partial^2 d(\mu | \mu')}{\partial h'_k \partial h'_j} = \frac{\partial^2 \mathcal{P}[\mathcal{H}_{h'}]}{\partial h'_k \partial h'_j}$$

740 Given two maximum entropy Markov chains specified by  $\mathcal{H}_h$  and  $\mathcal{H}_{h'}$  in the limit of large  $T$  they are  
741  $\epsilon$ -indistinguishable if:

$$\frac{1}{2} [(\mathbf{h} - \mathbf{h}')^T \chi (\mathbf{h} - \mathbf{h}')] \leq \frac{\epsilon}{T} \quad (22)$$

742 where  $\chi$  is the Fisher information matrix, which represents the curvature of the relative entropy.

## 743 **Materials and Methods**

### 744 **Ethics Statement**

745 Animal manipulation and breeding and corresponding experiments were approved by the bioethics  
746 committee of the Universidad de Valparaiso, in accordance with the bioethics regulation of the Chilean  
747 Research Council (CONICYT) and international protocols.

### 748 **Animals and Recordings**

749 4 Adult male and female Octodon degus (3-6 months) were maintained in the animal facility of the  
750 Universidad de Valparaiso, at 20–25°C on a 12-h light-dark cycle, with access to food and water ad-  
751 libitum. The methods of MEA recording has previously been described [26]. In brief, animals were  
752 euthanized under deep isofluorano or halothane anesthesia and both eyes were extracted. Then, one of  
753 the extracted retinas was diced into quarters while the other was stored in oxygenated in oxygenated  
754 ( $O_2$  95%  $CO_2$  5%) AMES medium at 32°C in the dark for further experiments. The same AMES  
755 media was used for continuous perfusion during extracellular recordings. For MEA recordings (MEA  
756 USB-256, 20kHz sample, Multichannel Systems GmbH, Germany), one piece of retina was mounted  
757 onto a dialysis membrane placed into a ring device mounted in a traveling (up/down) cylinder, which  
758 was moved to contact the electrode surface of the MEA recording array. Data were processed off-line  
759 using Plexon Offline Sorter (Plexon Instruments). Further, spikes were detected using a threshold of  
760 -4.5 to -5.5 S.D. from the mean voltage value and then were manually classified using the 2D space of  
761 the first two principal components on each electrode. Only somatic spikes were kept. Refractory period  
762 violations were detected and discarded if two or more spikes of the same neuron occur in a 2ms period.  
763 We recorded on 3 stimuli conditions (see next section): i) Photopic Spontaneous Activity (PSA), ii)  
764 Spatio-temporal white Noise (WN) and iii) Natural Movie (NM), obtaining 151, 200, 246 and 270  
765 RGC for each of the 4 experiments, respectively. For each experiment 30 random subsamples of 50  
766 neurons were taken and  $\chi$  matrix corresponding to a Pairwise R=2 model were computed considering  
767 4 bin sizes (1, 5, 10 and 20 ms) for each subsample, yielding 30  $k_c$  values per experiment, per condition  
768 and per bin size. The shuffled version of these rasters were submitted to the same analysis.

## 769 Visual Stimuli

770 Visual stimuli were generated by a custom software created with PsychoToolbox (Matlab) on a Mini-  
771 Mac Apple computer and projected onto the retina with a LED projector (PLED-W500, Viewsonic,  
772 USA) equipped with an electronic shutter (Vincent Associates, Rochester, USA) and connected to an  
773 inverted microscope (Lens 4x, Eclipse TE2000, NIKON, Japan). The image was by 380 x 380 pixels,  
774 each covering  $5\mu m^2$ . Since rodents are dichromatic (green and blue/UV cones), in our experiments  
775 only the B (blue) and G (green) beams of the projector were used, while the R (red) channel was used  
776 for signal synchronization. Dark spontaneous activity was recorded in order to monitor the stabiliza-  
777 tion of the activity. The stimuli where applied. For PSA a space-time invariant stimuli with G and B  
778 intensities equal to the mean intensity of the NM stimulus were presented for 15 mins. WN stimulus  
779 with a block size of  $50\mu m$  was used at a rate of 60 fps and presented for 20 mins, with each block  
780 taking independently 0 or 255 (max value) in the pixel value scale. NM consisted of an 1800 frames  
781 movie recorded on the natural habitat of the rodent using a robotic solution to capture the natural  
782 visual environment of degus, including grass, trees, optic flow, head-like movements. This short movie  
783 was presented 40 times at a refresh rate of 60fps, yielding a total duration of 20 mins. Optical density  
784 filters in the optical path were used to control final light intensity. A CCD camera (Pixelfly, PCO,  
785 USA) attached to the microscope was used for online visualization and calibration of the light stimuli  
786 projected onto the recording array.

## 787 Generation of Synthetic Data

788 Synthetic rasters ( $T = 2.10^6$  time-points,  $N = 20$  neurons) were generated using different underlying  
789 statistics: **Independent**, where only firing rates are defined,  $L = N$ ; **Pairwise R=2** (PWR2), with  
790 firing rates and spatio-temporal correlations,  $L = N(3N - 1)/2$ . Underlying coefficients related to  
791 firing rates and to pairwise interactions were randomly chosen from a normal distribution with mean  
792 -5 and -1, respectively, and 1 standard deviation. were generated scaling the magnitude of the model  
793 parameters by a factor  $\beta = [0.4 \ 0.6 \ 0.8 \ 1.2 \ 1.4]$ . In addition, 6 more random PWR2 rasters were  
794 generated with  $N = [30 \ 40 \ 50 \ 60 \ 70 \ 80]$  to study the dependence between  $k_c$  estimation and the  
795 network size. Each raster was generated using the PRANAS software (<https://pranas.inria.fr/>) [45].  
796 For the first 3 rasters, 100 random subsamples with half duration of the whole recording were taken  
797 for each raster and the  $\chi$  matrix associated with a Pairwise R=2 model was computed. Then,  $k_c$  (see  
798 text) was found by volume minimization, yielding 100  $k_c$  values per raster. For the scales rasters, the  
799 same procedure was applied, but using 10 temporal subsamples.

## 800 Shuffling

801 In order to destroy the dependencies between the empirical raster monomials, we have generated  
802 random rasters where the number of neurons and firing rates was exactly the same than observed  
803 on the recordings (i.e. on each retina under each stimuli condition), but the spikes times were taken  
804 uniformly at random, avoiding violations of the refractory period (2ms) [44]

## 805 Acknowledgments

806 Financial support: CONICYT-FONDECYT 1140403 and 1150638, CONICYT-Basal Project FB0008  
807 (Chile), CONICYT-PAI Inserción 79160120; Grant ICM-P09-022-F supported by the Millenium Sci-  
808 entific Initiative of the Ministerio de Economía, Desarrollo y Turismo (Chile); ECOS-Conicyt C13E06;  
809 ONR Research Grant #N62909-14-1-N121, ANR TRAJECTORY CE37 (France). We thank Felipe  
810 Olivares and Michael Pizarro to help in the experiments.

## 811 References

812 [1] Rieke F, Warland D, van Steveninck R, Bialek W, Spikes, Exploring the Neural Code, The M.I.T.  
813 Press. 1996.

- 814 [2] Schneidman E, Berry MJ, Segev R, Bialek W. Weak pairwise correlations imply strongly corre-  
815 lated network states in a neural population. *Nature*. 2006.
- 816 [3] Shlens J, Field GD, Gauthier JL, Grivich MI, Petrusca D, Sher A, Litke AM, Chichilnisky EJ.  
817 The Structure of Multi-Neuron Firing Patterns in Primate Retina. *Journal of Neuroscience*. 2006.
- 818 [4] Da Silveira RA, Berry MJ. High-Fidelity Coding with Correlated Neurons. *PLoS Computational*  
819 *Biology*. 2014.
- 820 [5] Brunel N, Hakim V. Fast global oscillations in networks of integrate-and-fire neurons with low  
821 firing rates. *Neural Computation*. 1999.
- 822 [6] Lindner B, Doiron B, Longtin A. Theory of oscillatory firing induced by spatially correlated noise  
823 and delayed inhibitory feedback *Physical Review E*. 2005.
- 824 [7] Trousdale J, Hu Y, Shea-Brown E, Josic K. Impact of network structure and cellular response  
825 on spike time correlations. *PLoS Computational Biology*. 2012.
- 826 [8] Ganmor E, Segev R, Schneidman E. The architecture of functional interaction networks in the  
827 retina. *Journal of Neuroscience*. 2011.
- 828 [9] Ganmor E, Segev R, Schneidman E. Sparse low-order interaction network underlies a highly  
829 correlated and learnable neural population code. *Proceedings of the National Academy of sciences*.  
830 2011.
- 831 [10] Tkacik G, Marre O, Mora T, Amodei D, 2nd MJB, Bialek W. The simplest maximum entropy  
832 model for collective behavior in a neural network. *Journal Statistical Mechanics*. 2013.
- 833 [11] Marre O, El Boustani S, Frégnac Y, Destexhe A. Prediction of Spatiotemporal Patterns of Neural  
834 Activity from Pairwise Correlations. *Physical Review Letters*. 2009.
- 835 [12] Cofré R, Cessac B. Dynamics and spike trains statistics in conductance-based Integrate-and-Fire  
836 neural networks with chemical and electric synapses. *Chaos, Solitons and Fractals*. 2013.
- 837 [13] Cofré R. and Cessac B. Exact computation of the maximum-entropy potential of spiking neural-  
838 network models. *Physical Review E*. 2014.
- 839 [14] Nasser H, Marre O, Cessac B. Spatio-temporal spike train analysis for large scale networks  
840 using the maximum entropy principle and Montecarlo method. *Journal of Statistical Mechanics:*  
841 *Theory and Experiment*. 2013.
- 842 [15] Nasser H, Cessac B. Parameters estimation for spatio-temporal maximum entropy distributions:  
843 application to neural spike trains. *Entropy*. 2014.
- 844 [16] Vasquez JC, Marre O, Palacios A, Berry MJ, Cessac B. Gibbs distribution analysis of temporal  
845 correlation structure on multicell spike trains from retina ganglion cells. *Journal Physiology Paris*.  
846 2012.
- 847 [17] Pillow JW, Shlens J, Paninski L, Sher A, Litke AM, Chichilnisky EJ, Simoncelli EP. Spatio-  
848 temporal correlations and visual signalling in a complete neuronal population. *Nature*. 2008.
- 849 [18] Trenholm S, Mclaughlin AJ, Schwab DJ, Turner MH, Smith RG, Rieke F, Awatramani GB. Non-  
850 linear dendritic integration of electrical and chemical synaptic inputs drives fine-scale correlations.  
851 *Nature Neuroscience*. 2014.
- 852 [19] Puchalla JL, Schneidman E, Harris Ra, Berry MJ. Redundancy in the population code of the  
853 retina. *Neuron*. 2005.
- 854 [20] Narayanan NS, Kimchi EY, Laubach M. Redundancy and synergy of neuronal ensembles in motor  
855 cortex. *Journal of Neuroscience*. *Neuroscience*. 2005.

- 856 [21] Tkacik G, Prentice JS, Balasubramanian V, Schneidman E. Optimal population coding by noisy  
857 spiking neurons. *Proceedings of the National Academy of Sciences*. 2010.
- 858 [22] Simmons KD, Prentice JS, Tkacik G, Homann J, Yee HK, Palmer SE, Nelson PC, Balasubra-  
859 manian V. Transformation of stimulus correlations by the retina. *PLoS Computational Biology*.  
860 2013;
- 861 [23] Sessak V, Monasson R. Small-correlation expansions for the inverse Ising problem. *Journal of*  
862 *Physics A: Mathematical and Theoretical*. 2009.
- 863 [24] Amari Si, Nagaoka H, Harada D. *Methods of information geometry*. Translations of mathematical  
864 monographs of the AMS. (Oxford University Press). 2000.
- 865 [25] Panas D, Amin H, Maccione A, Muthmann O, van Rossum M, Berdondini L, Hennig MG. Slop-  
866 piness in Spontaneously Active Neuronal Networks. *Journal of Neuroscience*. 2015.
- 867 [26] Palacios-Muñoz A, Escobar MJ, Vielma A, Araya J, Astudillo A, Valdivia G, García IE, Hurtado  
868 J, Schmachtenberg O, Martínez AD, Palacios AG. Role of connexin channels in the retinal light  
869 response of a diurnal rodent. *Frontiers in Cellular Neuroscience*. 2014.
- 870 [27] Bozdogan H. Model selection and Akaike's Information Criterion (AIC): The general theory and  
871 its analytical extensions. *Psychometrika*. 1987.
- 872 [28] Battaglia D, Thomas B, Hansen EC, Chettouf S, Daffertshofer A, McIntosh AR, Zimmermann  
873 J, Ritter P, Jirsa V. Functional Connectivity Dynamics of the Resting State across the Human  
874 Adult Lifespan. *bioRxiv* 107243. 2017.
- 875 [29] Zaghoul KA, Boahen K, Demb JB. Contrast adaptation in subthreshold and spiking responses  
876 of mammalian Y-type retinal ganglion cells. *Journal of Neuroscience*. 2005.
- 877 [30] Gollisch T, Meister M. Eye smarter than scientists believed: neural computations in circuits of  
878 the retina. *Neuron*. 2010.
- 879 [31] Vidne M, Ahmadian Y, Shlens J, Pillow JW, Kulkarni J, Litke AM, Chichilnisky EJ, Simoncelli  
880 E, Paninski L. Modeling the impact of common noise inputs on the network activity of retinal  
881 ganglion cells. *Journal of Computational Neuroscience*. 2012.
- 882 [32] Tkacik G, Prentice JS, Balasubramanian V, Schneidman E. Optimal population coding by noisy  
883 spiking neurons. *Proceedings of the National Academy of Sciences*. 2010.
- 884 [33] Vasquez JC, Palacios A, Marre O, II MJB, Cessac B. Gibbs distribution analysis of temporal  
885 correlation structure on multicell spike trains from retina ganglion cells. *Journal of Physiology*  
886 *Paris*. 2012.
- 887 [34] Cessac B, Palacios A. Spike Train Statistics from Empirical Facts to Theory: The Case of the  
888 Retina.. In: Cazals F., Kornprobst P. (eds) *Modeling in Computational Biology and Biomedicine*.  
889 Springer. 2013.
- 890 [35] Keller G. *Equilibrium States in Ergodic Theory*. Cambridge University Press. 1998.
- 891 [36] Mastromatteo I. On the criticality of inferred models. *J. Stat. Mech. Theory Exp*, 2011.
- 892 [37] Ruelle D. *Statistical Mechanics: Rigorous results*. New York. 1969.
- 893 [38] Ruelle D. *Thermodynamic formalism*. Addison-Wesley, Reading, Massachusetts. 1978.
- 894 [39] Sinai Y. Gibbs measures in ergodic theory. *Russian Mathematical Surveys*. 1972.
- 895 [40] Georgii HO. Gibbs measures and phase transitions. *De Gruyter Studies in Mathematics*. 1988.

- 896 [41] Balasubramanian V. Statistical inference, Occam's Razor, and statistical mechanics on the space  
897 of probability distributions. *Neural Computation*. 1997.
- 898 [42] Jaynes ET. Information theory and statistical mechanics. *Physical Review*. 1957.
- 899 [43] Privman V, Fisher MJ. Universal critical amplitudes in finite-size scaling. *Physical Review B*.  
900 1984.
- 901 [44] Segev R, Goodhouse J, Puchalla J, Berry MJ. Recording spikes from a large fraction of the  
902 ganglion cells in a retinal patch, *Nature Neuroscience*. 2004.
- 903 [45] Cessac B, Kornprobst P, Kraria S, Nasser H, Pamplona D, Portelli G, Viéville T. PRANAS: a  
904 new platform for retinal analysis and simulation, *Frontiers in Neuroinformatics*. 2017.
- 905 [46] Savin C, Tkačik G. Maximum entropy models as a tool for building precise neural controls,  
906 *Current Opinion in Neurobiology*. 2017.
- 907 [47] Tkačik G, Marre O, Mora T, and Amodei D, and Berry II MJ, and Bialek W. The simplest maxi-  
908 mum entropy model for collective behavior in a neural network, *Journal of Statistical Mechanics*.  
909 2013.
